# Supplementary material for: Cyclization/hydrolysis of 1,5-enenitriles initiated by sulfonyl radicals in the aqueous phase in the presence of the I2/TBHP system
Source: Royal Society of Chemistry journal article supplement (doi:10.1039/d2ob01124g), 2022-01-01
Supplement: d2ob01124g1.pdf [file d2ob01124g1.pdf]

# **Cyclization/hydrolysis of 1,5-enenitriles initiated by sulfonyl radicals in aqueous phase under I<sub>2</sub>/TBHP system**

Sen-Jie Hu,<sup>a</sup> Li-Lin Jiang,<sup>a</sup> Hui Qiu,<sup>a</sup> Chun-Mei Luo,<sup>a</sup> Yu-Tao Guan,<sup>a</sup> Long Li,<sup>a</sup>  
Youren Dong,<sup>\*a</sup> Ke-Wei Lei<sup>\*a</sup> and Wen-Ting Wei<sup>\*a</sup>

<sup>a</sup> Institute of Drug Discovery Technology, School of Materials Science and  
Chemical Engineering, Ningbo University, Ningbo, Zhejiang, 315211, China.

E-mail: [weiwenting@nbu.edu.cn](mailto:weiwenting@nbu.edu.cn); [leikewei@nbu.edu.cn](mailto:leikewei@nbu.edu.cn);  
[dongyouren@nbu.edu.cn](mailto:dongyouren@nbu.edu.cn)

## **Supporting Information**

### **List of Contents**

|                                                                          |               |
|--------------------------------------------------------------------------|---------------|
| <b>(A) Typical experimental procedure for the cyclization/hydrolysis</b> | <b>S2</b>     |
| <b>(B) Analytical data</b>                                               | <b>S2-13</b>  |
| <b>(C) Reference</b>                                                     | <b>S13</b>    |
| <b>(D) Spectra</b>                                                       | <b>S14-41</b> |
| <b>(E) The X-ray single-crystal diffraction analysis of product 3a</b>   | <b>S42-47</b> |

### (A) Typical experimental procedure for the cyclization/hydrolysis

To a Schlenk tube were added 1,5-enenitrile **1** (0.2 mmol), sulfonyl hydrazide **2** (2.0 equiv.), I<sub>2</sub> (10 mol%) and TBHP (2.0 equiv.). Then the tube was stirred at 85 °C sealed in N<sub>2</sub> for the indicated time until complete consumption of starting material as monitored by TLC and/or GC-MS analysis. After the reaction was finished, the mixture was extracted three times with EtOAc. The organic layer was dried over Na<sub>2</sub>SO<sub>4</sub>, filtration, and evaporation of the solvent. The mixture was purified by flash column chromatography over silica gel (hexane/ethyl acetate = 2:1) to afford the desired product **3**. This reaction can not be directly precipitated and filtered to obtain the products because of the following reason: There are a bit byproducts produced in the transformation, so the precipitation and filtration produce a mixture that cannot be purified.

### (B) Analytical data

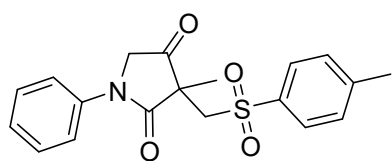

#### **3-Methyl-1-phenyl-3-(tosylmethyl)pyrrolidine-2,4-**

**dione (3a)**, white solid (0.0659 g, 92% yield); <sup>1</sup>H

NMR (500 MHz, CDCl<sub>3</sub>)  $\delta$ : 7.71-7.67 (m, 4H), 7.44

(t, *J* = 7.5 Hz, 2H), 7.29 (d, *J* = 8.0 Hz, 2H), 7.25 (d, *J* = 7.5 Hz, 1H), 4.63 (d, *J* = 17.0

Hz, 1H), 4.40 (d, *J* = 17.0 Hz, 1H), 3.87 (d, *J* = 14.5 Hz, 1H), 3.73 (d, *J* = 14.5 Hz,

1H), 2.42 (s, 3H), 1.36 (s, 3H); <sup>13</sup>C NMR (126 MHz, CDCl<sub>3</sub>)  $\delta$ : 205.8, 171.2, 145.1,

137.9, 136.9, 129.9, 129.2, 127.8, 125.7, 120.9, 61.7, 56.3, 50.0, 21.6 (2); HRMS *m/z*

(ESI) calcd for C<sub>19</sub>H<sub>20</sub>NO<sub>4</sub>S([M+H]<sup>+</sup>) 358.1108, found 358.1112.

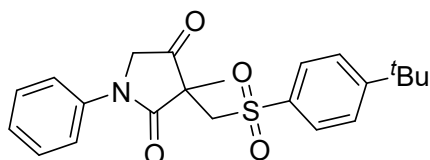

**3-(((4-(*tert*-Butyl)phenyl)sulfonyl)methyl)-3-methyl-1-phenylpyrrolidine-2,4-dione (3b)**, white solid (0.0728 g, 91% yield); <sup>1</sup>H NMR (500 MHz, CDCl<sub>3</sub>) δ: 7.75-7.74 (m, 2H), 7.67-7.65 (m, 2H), 7.50-7.49 (m, 2H), 7.44 (t, *J* = 8.0 Hz, 2H), 7.25 (d, *J* = 7.5 Hz, 1H), 4.64 (d, *J* = 17.0 Hz, 1H), 4.40 (d, *J* = 17.5 Hz, 1H), 3.88 (d, *J* = 14.5 Hz, 1H), 3.73 (d, *J* = 14.5 Hz, 1H), 1.37 (s, 3H), 1.33 (s, 9H); <sup>13</sup>C NMR (126 MHz, CDCl<sub>3</sub>) δ: 205.8, 171.2, 158.0, 137.9, 136.7, 129.2, 127.6, 126.3, 125.7, 120.9, 61.7, 56.3, 49.9, 35.3, 31.0, 21.6; HRMS *m/z* (ESI) calcd for C<sub>22</sub>H<sub>26</sub>NO<sub>4</sub>S ([M+H]<sup>+</sup>) 400.1577, found 400.1581.

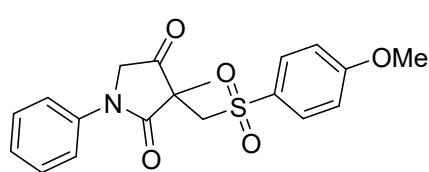

**3-(((4-Methoxyphenyl)sulfonyl)methyl)-3-methyl-1-phenylpyrrolidine-2,4-dione (3c)**,

white solid (0.0694 g, 93% yield.); <sup>1</sup>H NMR (500 MHz, CDCl<sub>3</sub>) δ: 7.75 (d, *J* = 8.5 Hz, 2H), 7.68 (d, *J* = 8.5 Hz, 2H), 7.44 (t, *J* = 8.0 Hz, 2H), 7.25 (d, *J* = 7.0 Hz, 1H), 6.94 (d, *J* = 8.5 Hz, 2H), 4.63 (d, *J* = 17.5 Hz, 1H), 4.39 (d, *J* = 17.0 Hz, 1H), 3.88 (d, *J* = 14.0 Hz, 1H), 3.85 (s, 3H), 3.73 (d, *J* = 14.0 Hz, 1H), 1.36 (s, 3H); <sup>13</sup>C NMR (126 MHz, CDCl<sub>3</sub>) δ: 205.8, 171.3, 164.0, 137.9, 131.3, 130.0, 129.2, 125.7, 120.9, 114.5, 62.0, 56.3, 55.7, 50.0, 21.6; HRMS *m/z* (ESI) calcd for C<sub>19</sub>H<sub>20</sub>NO<sub>5</sub>S ([M+H]<sup>+</sup>) 374.1057, found 374.1051.

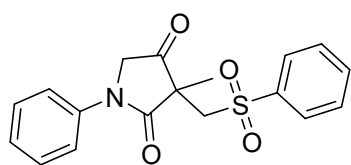

**3-Methyl-1-phenyl-3-((phenylsulfonyl)methyl)pyrrolidine-2,4-dione (3d)**,

white solid (0.0597 g, 87% yield.); <sup>1</sup>H NMR (500 MHz, CDCl<sub>3</sub>) δ: 7.84 (d, *J* = 7.5 Hz, 2H), 7.68-7.62 (m, 3H), 7.51 (t, *J* = 8.0 Hz, 2H), 7.44 (t, *J* = 8.0 Hz, 2H), 7.26 (t, *J* = 3.0 Hz, 1H), 4.63 (d, *J* = 17.5 Hz, 1H), 4.41 (d, *J* =

17.0 Hz, 1H), 3.89 (d,  $J = 14.5$  Hz, 1H), 3.75 (d,  $J = 14.5$  Hz, 1H), 1.37 (s, 3H);  $^{13}\text{C}$  NMR (126 MHz,  $\text{CDCl}_3$ )  $\delta$ : 205.8, 171.2, 139.8, 137.8, 134.0, 129.3, 129.1, 127.7, 125.8, 120.9, 61.6, 56.3, 50.0, 21.6; HRMS  $m/z$  (ESI) calcd for  $\text{C}_{18}\text{H}_{18}\text{NO}_4\text{S}$  ( $[\text{M}+\text{H}]^+$ ) 344.0951, found 344.0955.

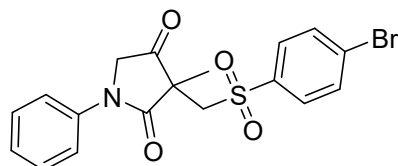

**3-(((4-Bromophenyl)sulfonyl)methyl)-3-methyl-1-phenylpyrrolidine-2,4-dione (3e)**, white solid (0.0717 g, 85% yield);  $^1\text{H}$  NMR (500 MHz,  $\text{CDCl}_3$ )

$\delta$ : 7.69-7.66 (m, 3H), 7.65-7.62 (m, 3H), 7.45 (t,  $J = 8.0$  Hz, 2H), 7.26 (t,  $J = 3.5$  Hz, 1H), 4.60 (d,  $J = 17.5$  Hz, 1H), 4.41 (d,  $J = 17.5$  Hz, 1H), 3.89 (d,  $J = 14.5$  Hz, 1H), 3.76 (d,  $J = 14.5$  Hz, 1H), 1.37 (s, 3H);  $^{13}\text{C}$  NMR (126 MHz,  $\text{CDCl}_3$ )  $\delta$ : 205.5, 171.1, 138.8, 137.7, 132.6, 129.3, 129.2, 128.0, 125.9, 120.8, 61.5, 56.2, 50.1, 21.6; HRMS  $m/z$  (ESI) calcd for  $\text{C}_{18}\text{H}_{17}\text{BrNO}_4\text{S}$  ( $[\text{M}+\text{H}]^+$ ) 422.0056, found 422.0050.

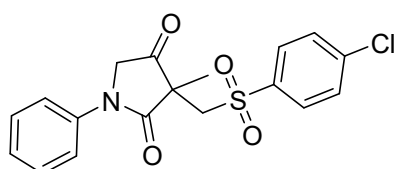

**3-(((4-Chlorophenyl)sulfonyl)methyl)-3-methyl-1-phenylpyrrolidine-2,4-dione (3f)**, white solid (0.0605 g, 80% yield.);  $^1\text{H}$  NMR (500 MHz,  $\text{CDCl}_3$ )

$\delta$ : 7.77-7.75 (m, 2H), 7.68-7.65 (m, 2H), 7.48-7.44 (m, 4H), 7.27 (t,  $J = 4.5$  Hz, 1H), 4.61 (d,  $J = 17.0$  Hz, 1H), 4.41 (d,  $J = 17.0$  Hz, 1H), 3.89 (d,  $J = 14.5$  Hz, 1H), 3.76 (d,  $J = 14.5$  Hz, 1H), 1.38 (s, 3H);  $^{13}\text{C}$  NMR (126 MHz,  $\text{CDCl}_3$ )  $\delta$ : 205.6, 171.1, 140.9, 138.3, 137.8, 129.6, 129.3 (2), 125.9, 120.8, 61.6, 56.2, 50.2, 21.6; HRMS  $m/z$  (ESI) calcd for  $\text{C}_{18}\text{H}_{17}\text{ClNO}_4\text{S}$  ( $[\text{M}+\text{H}]^+$ ) 378.0561, found 378.0567.

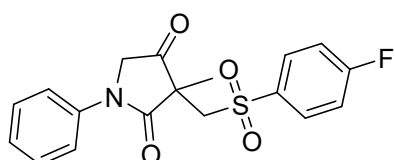

**3-(((4-Fluorophenyl)sulfonyl)methyl)-3-methyl-1-phenylpyrrolidine-2,4-dione (3g)**, white solid

(0.0543 g, 75% yield);  $^1\text{H}$  NMR (500 MHz,  $\text{CDCl}_3$ )  $\delta$ : 7.86-7.83 (m, 2H), 7.66 (d,  $J = 8.5$  Hz, 2H), 7.44 (t,  $J = 8.0$  Hz, 2H), 7.27 (t,  $J = 4.0$  Hz, 1H), 7.17 (t,  $J = 8.5$  Hz, 2H), 4.62 (d,  $J = 17.5$  Hz, 1H), 4.42 (d,  $J = 17.5$  Hz, 1H), 3.90 (d,  $J = 14.5$  Hz, 1H), 3.76 (d,  $J = 14.5$  Hz, 1H), 1.37 (s, 3H);  $^{13}\text{C}$  NMR (126 MHz,  $\text{CDCl}_3$ )  $\delta$ : 205.6, 171.2, 165.9 (d,  $J_{\text{C-F}} = 255.5$  Hz), 137.7, 135.8 (d,  $J_{\text{C-F}} = 3.1$  Hz), 130.7 (d,  $J_{\text{C-F}} = 9.8$  Hz), 129.2, 125.9, 120.9, 116.6 (d,  $J_{\text{C-F}} = 22.6$  Hz), 61.6, 56.2, 50.1, 21.5;  $^{19}\text{F}$  NMR (471 MHz,  $\text{CDCl}_3$ )  $\delta$ : -102.6; HRMS  $m/z$  (ESI) calcd for  $\text{C}_{18}\text{H}_{17}\text{FNO}_4\text{S}$  ( $[\text{M}+\text{H}]^+$ ) 362.0857, found 362.0853.

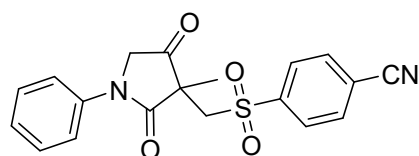

**4-(((3-Methyl-2,4-dioxo-1-phenylpyrrolidin-3-yl)methyl)sulfonyl)benzonitrile (3h)**, white solid

(0.0517 g, 70 % yield);  $^1\text{H}$  NMR (500 MHz,  $\text{CDCl}_3$ )  $\delta$ : 7.95-7.94 (m, 2H), 7.80-7.78 (m, 2H), 7.66-7.64 (m, 2H), 7.47 (t,  $J = 8.0$  Hz, 2H), 7.29 (t,  $J = 7.5$  Hz, 1H), 4.62 (d,  $J = 17.0$  Hz, 1H), 4.43 (d,  $J = 17.5$  Hz, 1H), 3.92 (d,  $J = 15.0$  Hz, 1H), 3.82 (d,  $J = 15.0$  Hz, 1H), 1.39 (s, 3H);  $^{13}\text{C}$  NMR (126 MHz,  $\text{CDCl}_3$ )  $\delta$ : 205.2, 171.0, 143.9, 137.7, 133.0, 129.4, 128.5, 126.0, 120.7, 117.8, 117.0, 61.2, 56.2, 50.3, 21.6; HRMS  $m/z$  (ESI) calcd for  $\text{C}_{19}\text{H}_{17}\text{N}_2\text{O}_4\text{S}$  ( $[\text{M}+\text{H}]^+$ ) 369.0904, found 369.0900.

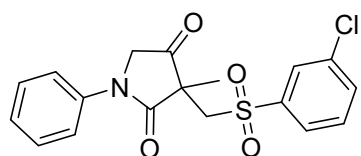

**3-(((3-Chlorophenyl)sulfonyl)methyl)-3-methyl-1-phenylpyrrolidine-2,4-dione (3i)**, white solid

(0.0597 g, 79% yield);  $^1\text{H}$  NMR (500 MHz,  $\text{CDCl}_3$ )  $\delta$ : 7.82 (t,  $J = 2.0$  Hz, 2H), 7.73-7.71 (m, 1H), 7.68-7.66 (m, 2H), 7.62-7.60 (m, 1H), 7.48-7.43 (m, 3H), 7.27 (d,  $J = 6.5$  Hz, 1H), 4.62 (d,  $J = 17.5$  Hz, 1H), 4.43 (d,  $J = 17.5$  Hz, 1H), 3.90 (d,  $J = 14.5$  Hz, 1H), 3.77 (d,  $J = 14.5$  Hz, 1H), 1.38 (s, 3H);  $^{13}\text{C}$  NMR (126 MHz,  $\text{CDCl}_3$ )  $\delta$ : 205.5, 171.0,

141.5, 137.7, 135.5, 134.2, 130.6, 129.3, 127.9, 125.9 (2), 120.9, 61.4, 56.3, 50.1, 21.6; HRMS  $m/z$  (ESI) calcd for  $C_{18}H_{17}ClNO_4S$  ( $[M+H]^+$ ) 378.0561, found 378.0567.

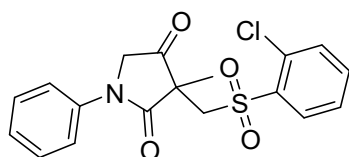

**3-(((2-Chlorophenyl)sulfonyl)methyl)-3-methyl-1-**

**phenylpyrrolidine-2,4-dione (3j)**, white solid (0.0590

g, 78% yield.);  $^1H$  NMR (500 MHz,  $CDCl_3$ )  $\delta$ : 7.82-7.80

(m, 1H), 7.59-7.57 (m, 2H), 7.55-7.51 (m, 2H), 7.41 (t,  $J = 8.0$  Hz, 1H), 7.26-7.22 (m, 2H), 4.57 (d,  $J = 17.5$  Hz, 1H), 4.37 (d,  $J = 17.0$  Hz, 1H), 4.26 (d,  $J = 15.0$  Hz, 1H), 3.96 (d,  $J = 15.0$  Hz, 1H), 1.38 (s, 3H);  $^{13}C$  NMR (126 MHz,  $CDCl_3$ )  $\delta$ : 205.3, 170.7, 137.7, 137.4, 135.0, 132.5, 131.8, 130.7, 129.1, 127.2, 125.6, 120.5, 59.6, 56.0, 49.9, 21.6; HRMS  $m/z$  (ESI) calcd for  $C_{18}H_{17}ClNO_4S$  ( $[M+H]^+$ ) 378.0561, found 378.0557.

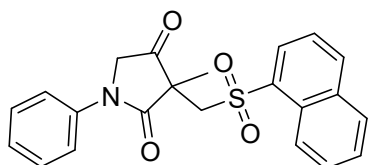

**3-Methyl-3-((naphthalen-1-ylsulfonyl)methyl)-1-**

**phenylpyrrolidine-2,4-dione (3k)**, white solid (0.0638

g, 81% yield);  $^1H$  NMR (500 MHz,  $CDCl_3$ )  $\delta$ : 8.36 (s,

1H), 7.98 (d,  $J = 8.5$  Hz, 1H), 7.91 (d,  $J = 8.5$  Hz, 1H), 7.82-7.80 (m, 2H), 7.65 (t,  $J = 7.0$  Hz, 3H), 7.58 (t,  $J = 15.0$  Hz, 1H), 7.41 (t,  $J = 8.0$  Hz, 2H), 7.24 (d,  $J = 7.0$  Hz, 1H), 4.68 (d,  $J = 17.0$  Hz, 1H), 4.42 (d,  $J = 17.5$  Hz, 1H), 3.96 (d,  $J = 14.5$  Hz, 1H), 3.82 (d,  $J = 14.5$  Hz, 1H), 1.37 (s, 3H);  $^{13}C$  NMR (126 MHz,  $CDCl_3$ )  $\delta$ : 205.8, 171.1, 137.9, 136.5, 135.4, 131.9, 129.8 (2), 129.5, 129.4, 129.2, 128.0, 127.7, 125.7, 122.1, 120.8, 61.6, 56.3, 50.0, 21.7; HRMS  $m/z$  (ESI) calcd for  $C_{22}H_{20}NO_4S$  ( $[M+H]^+$ ) 394.1108, found 394.1114.

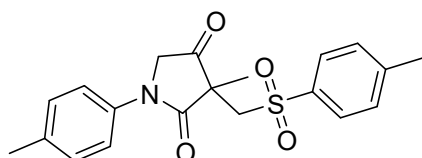

**3-Methyl-1-(p-tolyl)-3-(tosylmethyl)pyrrolidine-**

**2,4-dione (3m)**, white solid (0.0670 g, 90% yield,

d.r. > 20:1); <sup>1</sup>H NMR (500 MHz, CDCl<sub>3</sub>) δ: 7.70 (d, *J* = 8.0 Hz, 2H), 7.53 (d, *J* = 8.5 Hz, 2H), 7.28 (d, *J* = 8.0 Hz, 2H), 7.23 (d, *J* = 8.0 Hz, 2H), 4.58 (d, *J* = 17.5 Hz, 1H), 4.37 (d, *J* = 17.0 Hz, 1H), 3.85 (d, *J* = 14.5 Hz, 1H), 3.71 (d, *J* = 14.5 Hz, 1H), 2.42 (s, 3H), 2.37 (s, 3H), 1.35 (s, 3H); <sup>13</sup>C NMR (126 MHz, CDCl<sub>3</sub>) δ: 206.0, 171.0, 145.0, 136.9, 135.5, 135.3, 129.8, 129.6, 127.7, 120.9, 61.6, 56.4, 49.8, 21.6 (2), 20.9; HRMS *m/z* (ESI) calcd for C<sub>20</sub>H<sub>22</sub>NO<sub>4</sub>S ([M+H]<sup>+</sup>) 372.1264, found 372.1260.

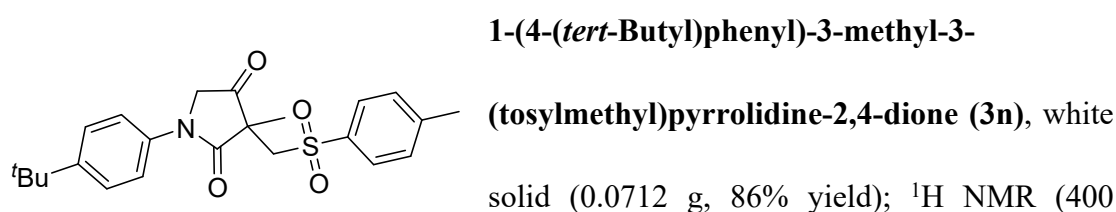

MHz, CDCl<sub>3</sub>) δ: 7.71 (d, *J* = 8.4 Hz, 2H), 7.60 (d, *J* = 8.8 Hz, 2H), 7.45 (d, *J* = 8.8 Hz, 2H), 7.28 (d, *J* = 8.0 Hz, 2H), 4.61 (d, *J* = 17.6 Hz, 1H), 4.39 (d, *J* = 17.2 Hz, 1H), 3.86 (d, *J* = 14.4 Hz, 1H), 3.72 (d, *J* = 14.4 Hz, 1H), 2.42 (s, 3H), 1.35 (s, 3H), 1.34 (s, 9H); <sup>13</sup>C NMR (101 MHz, CDCl<sub>3</sub>) δ: 206.0, 171.0, 148.7, 145.1, 136.8, 135.2, 129.9, 127.7, 126.0, 120.5, 61.6, 56.3, 49.9, 34.4, 31.2, 21.6 (2); HRMS *m/z* (ESI) calcd for C<sub>23</sub>H<sub>28</sub>NO<sub>4</sub>S ([M+H]<sup>+</sup>) 414.1734, found 414.1730.

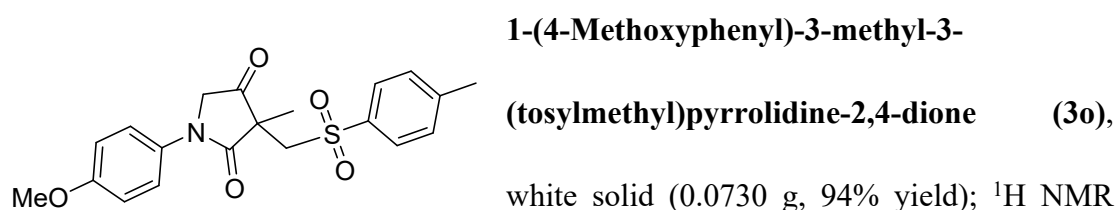

(500 MHz, CDCl<sub>3</sub>) δ: 7.71 (d, *J* = 8.5 Hz, 2H), 7.57-7.55 (m, 2H), 7.29 (d, *J* = 8.0 Hz, 2H), 6.97-6.95 (m, 2H), 4.57 (d, *J* = 17.0 Hz, 1H), 4.36 (d, *J* = 17.5 Hz, 1H), 3.84 (t, *J* = 7.5 Hz, 4H), 3.71 (d, *J* = 14.5 Hz, 1H), 2.42 (s, 3H), 1.35 (s, 3H); <sup>13</sup>C NMR (126 MHz, CDCl<sub>3</sub>) δ: 206.1, 170.9, 157.4, 145.1, 136.9, 130.9, 129.9, 127.7, 122.9, 114.3,

61.7, 56.8, 55.5, 49.6, 21.6, 21.5; HRMS  $m/z$  (ESI) calcd for  $C_{20}H_{22}NO_5S$  ( $[M+H]^+$ ) 388.1213, found 388.1219.

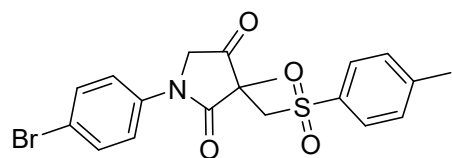

**1-(4-Bromophenyl)-3-methyl-3-**

**(tosylmethyl)pyrrolidine-2,4-dione (3p)**, white

solid (0.0698 g, 80% yield);  $^1H$  NMR (400 MHz,

$CDCl_3$ )  $\delta$ : 7.69 (d,  $J = 8.4$  Hz, 2H), 7.60-7.54 (m, 4H), 7.31 (d,  $J = 8.0$  Hz, 2H), 4.60

(d,  $J = 17.2$  Hz, 1H), 4.37 (d,  $J = 17.2$  Hz, 1H), 3.85 (d,  $J = 14.4$  Hz, 1H), 3.73 (d,  $J =$

14.4 Hz, 1H), 2.44 (s, 3H), 1.36 (s, 3H);  $^{13}C$  NMR (101 MHz,  $CDCl_3$ )  $\delta$ : 205.2, 171.4,

145.3, 137.0, 136.7, 132.2, 130.0, 127.7, 122.3, 118.8, 61.8, 56.1, 49.9, 21.7, 21.5;

HRMS  $m/z$  (ESI) calcd for  $C_{19}H_{19}BrNO_4S$  ( $[M+H]^+$ ) 436.0213, found 436.0209.

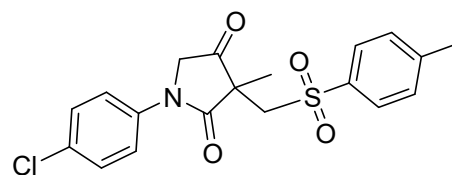

**1-(4-Chlorophenyl)-3-methyl-3-**

**(tosylmethyl)pyrrolidine-2,4-dione (3q)**, white

solid (0.0620 g, 79% yield);  $^1H$  NMR (500

MHz,  $CDCl_3$ )  $\delta$ : 7.69 (d,  $J = 8.0$  Hz, 2H), 7.64 (d,  $J = 9.0$  Hz, 2H), 7.41-7.39 (m, 2H),

7.30 (d,  $J = 8.0$  Hz, 2H), 4.60 (d,  $J = 17.0$  Hz, 1H), 4.37 (d,  $J = 17.0$  Hz, 1H), 3.85 (d,

$J = 14.5$  Hz, 1H), 3.72 (d,  $J = 14.0$  Hz, 1H), 2.43 (s, 3H), 1.36 (s, 3H);  $^{13}C$  NMR (126

MHz,  $CDCl_3$ )  $\delta$ : 205.3, 171.4, 145.3, 136.8, 136.5, 131.0, 129.9, 129.2, 127.7, 122.1,

61.8, 56.2, 49.9, 21.7, 21.5; HRMS  $m/z$  (ESI) calcd for  $C_{19}H_{19}ClNO_4S$  ( $[M+H]^+$ )

392.0718, found 392.0726.

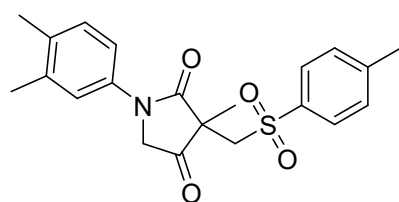

**1-(3,4-Dimethylphenyl)-3-methyl-3-**

**(tosylmethyl)pyrrolidine-2,4-dione (3r)**, white

solid (0.0687 g, 89 % yield);  $^1H$  NMR (500 MHz,



CDCl<sub>3</sub>)  $\delta$ : 7.71 (d,  $J$  = 8.5 Hz, 2H), 7.46 (s, 1H), 7.34-7.32 (m, 1H), 7.29 (d,  $J$  = 8.0 Hz, 2H), 7.18 (d,  $J$  = 8.5 Hz, 1H), 4.59 (d,  $J$  = 17.5 Hz, 1H), 4.36 (d,  $J$  = 17.5 Hz, 1H), 3.85 (d,  $J$  = 14.0 Hz, 1H), 3.71 (d,  $J$  = 14.0 Hz, 1H), 2.42 (s, 3H), 2.30 (s, 3H), 2.27 (s, 3H), 1.35 (s, 3H); <sup>13</sup>C NMR (126 MHz, CDCl<sub>3</sub>)  $\delta$ : 206.2, 171.0, 145.0, 137.5, 136.9, 135.6, 134.4, 130.1, 129.9, 127.8, 122.4, 118.5, 61.7, 56.6, 49.8, 21.6 (2), 20.0, 19.3; HRMS  $m/z$  (ESI) calcd for C<sub>21</sub>H<sub>24</sub>NO<sub>4</sub>S ([M+H]<sup>+</sup>) 386.1421, found 386.1427.

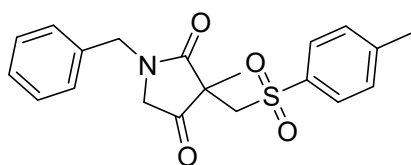

**1-Benzyl-3-methyl-3-(tosylmethyl)pyrrolidine-**

**2,4-dione (3s)**, white solid (0.0625 g, 84% yield);

<sup>1</sup>H NMR (400 MHz, CDCl<sub>3</sub>)  $\delta$ : 7.74 (d,  $J$  = 8.4 Hz,

2H), 7.36 (t,  $J$  = 7.2 Hz, 7H), 4.81 (d,  $J$  = 14.8 Hz, 1H), 4.64 (d,  $J$  = 14.8 Hz, 1H), 4.04 (d,  $J$  = 17.6 Hz, 1H), 3.81 (d,  $J$  = 11.6 Hz, 1H), 3.77 (d,  $J$  = 18.0 Hz, 1H), 3.64 (d,  $J$  = 14.4 Hz, 1H), 2.45 (s, 3H), 1.28 (s, 3H); <sup>13</sup>C NMR (101 MHz, CDCl<sub>3</sub>)  $\delta$ : 206.7, 172.1, 145.1, 137.1, 134.8, 129.9, 128.9, 128.3, 128.0, 127.7, 61.2, 54.3, 48.6, 46.3, 21.7, 21.5; HRMS  $m/z$  (ESI) calcd for C<sub>20</sub>H<sub>22</sub>NO<sub>4</sub>S ([M+H]<sup>+</sup>) 372.1264, found 372.1268.

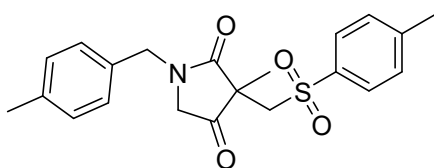

**3-Methyl-1-(4-methylbenzyl)-3-**

**(tosylmethyl)pyrrolidine-2,4-dione (3t)**, white

solid (0.0626 g, 81% yield); <sup>1</sup>H NMR (500 MHz,

CDCl<sub>3</sub>)  $\delta$ : 7.73 (d,  $J$  = 8.0 Hz, 2H), 7.37-7.31 (m, 3H), 7.23 (d,  $J$  = 8.0 Hz, 2H), 7.18 (d,  $J$  = 2.0 Hz, 1H), 4.77 (d,  $J$  = 14.5 Hz, 1H), 4.57 (d,  $J$  = 14.5 Hz, 1H), 4.01 (d,  $J$  = 17.5 Hz, 1H), 3.80 (d,  $J$  = 14.5 Hz, 1H), 3.74 (d,  $J$  = 17.5 Hz, 1H), 3.63 (d,  $J$  = 14.5 Hz, 1H), 2.44 (s, 3H), 2.34 (s, 3H), 1.26 (s, 3H); <sup>13</sup>C NMR (126 MHz, CDCl<sub>3</sub>)  $\delta$ :

206.7, 172.0, 145.1, 137.8, 137.2, 131.8, 129.9, 129.6, 128.4, 127.7, 61.3, 54.3, 48.7, 46.1, 21.7, 21.5, 21.1; HRMS  $m/z$  (ESI) calcd for  $C_{21}H_{24}NO_4S$  ( $[M+H]^+$ ) 386.1421, found 386.1427.

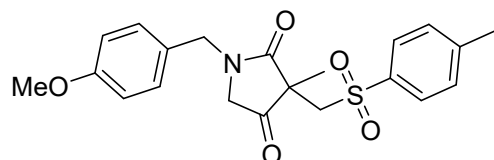

**1-(4-Methoxybenzyl)-3-methyl-3-(tosylmethyl)pyrrolidine-2,4-dione (3u),**

white solid (0.0611 g, 76% yield);  $^1H$  NMR (400 MHz,  $CDCl_3$ )  $\delta$ : 7.73 (d,  $J = 8.4$  Hz, 2H), 7.34 (d,  $J = 8.4$  Hz, 2H), 7.27 (t,  $J = 4.0$  Hz, 2H), 6.89 (d,  $J = 8.4$  Hz, 2H), 4.70 (d,  $J = 14.8$  Hz, 1H), 4.60 (d,  $J = 14.8$  Hz, 1H), 4.01 (d,  $J = 18.0$  Hz, 1H), 3.79 (s, 3H), 3.77 (d,  $J = 1.6$  Hz, 1H), 3.74 (d,  $J = 3.6$  Hz, 1H), 3.62 (d,  $J = 14.0$  Hz, 1H), 2.44 (s, 3H), 1.26 (s, 3H);  $^{13}C$  NMR (101 MHz,  $CDCl_3$ )  $\delta$ : 206.8, 172.0, 159.3, 145.1, 137.0, 129.9, 129.7, 127.7, 126.7, 114.2, 61.1, 55.2, 54.2, 48.7, 45.7, 21.6, 21.5; HRMS  $m/z$  (ESI) calcd for  $C_{21}H_{24}NO_5S$  ( $[M+H]^+$ ) 402.1370, found 402.1374.

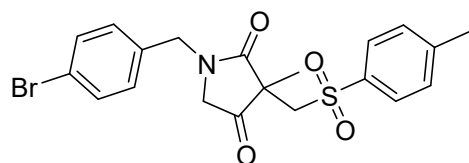

**1-(4-Bromobenzyl)-3-methyl-3-(tosylmethyl)pyrrolidine-2,4-dione (3v),**

white solid (0.0630 g, 70% yield);  $^1H$  NMR (400 MHz,  $CDCl_3$ )  $\delta$ : 7.73 (d,  $J = 8.0$  Hz, 2H), 7.50 (d,  $J = 8.4$  Hz, 2H), 7.35 (d,  $J = 8.0$  Hz, 2H), 7.27 (s, 1H), 7.24 (d,  $J = 3.6$ , 1H), 4.74 (d,  $J = 14.8$  Hz, 1H), 4.62 (d,  $J = 15.2$  Hz, 1H), 4.03 (d,  $J = 17.6$  Hz, 1H), 3.82-3.75 (m, 2H), 3.64 (d,  $J = 14.4$  Hz, 1H), 2.45 (s, 3H), 1.28 (s, 3H);  $^{13}C$  NMR (101 MHz,  $CDCl_3$ )  $\delta$ : 206.4, 172.2, 145.2, 137.0, 133.9, 132.0, 130.1, 129.9, 127.7, 122.1, 61.3, 54.3, 48.5, 45.7, 21.7, 21.5; HRMS  $m/z$  (ESI) calcd for  $C_{20}H_{21}BrNO_4S$  ( $[M+H]^+$ ) 450.0369, found 450.0373.

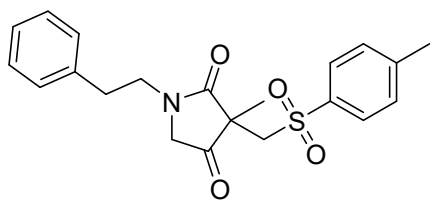

**3-Methyl-1-phenethyl-3-**

**(tosylmethyl)pyrrolidine-2,4-dione (3w)**, white

solid (0.0664 g, 86% yield); <sup>1</sup>H NMR (400 MHz,

CDCl<sub>3</sub>) δ: 7.73-7.67 (m, 2H), 7.32-7.27 (m, 7H), 4.09-3.94 (m, 2H), 3.74-3.57 (m,

4H), 3.03-2.93 (m, 2H), 2.43 (s, 3H), 1.11 (s, 3H); <sup>13</sup>C NMR (101 MHz, CDCl<sub>3</sub>) δ:

207.0, 172.0, 145.0, 138.1, 137.0, 129.8, 128.6 (2), 127.6, 126.6, 61.2, 55.3, 48.5,

43.5, 33.2, 21.6, 21.2; HRMS *m/z* (ESI) calcd for C<sub>21</sub>H<sub>24</sub>NO<sub>4</sub>S ([M+H]<sup>+</sup>) 386.1421,

found 386.1425.

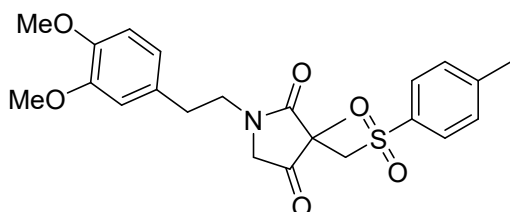

**1-(3,4-Dimethoxyphenethyl)-3-methyl-3-**

**(tosylmethyl)pyrrolidine-2,4-dione (3x)**,

yellow oil (0.0741 g, 83% yield); <sup>1</sup>H NMR

(400 MHz, CDCl<sub>3</sub>) δ: 7.71 (d, *J* = 8.0 Hz, 2H), 7.33 (d, *J* = 8.4 Hz, 2H), 6.81 (s, 1H),

6.80-6.76 (m, 2H), 4.08 (d, *J* = 17.6 Hz, 1H), 3.86 (s, 3H), 3.84 (s, 3H), 3.79-3.73 (m,

3H), 3.69-3.64 (m, 1H), 3.59 (d, *J* = 14.4 Hz, 1H), 3.00-2.87 (m, 2H), 2.43 (s, 3H),

1.13 (s, 3H); <sup>13</sup>C NMR (101 MHz, CDCl<sub>3</sub>) δ: 207.0, 172.0, 148.9, 147.6, 145.0, 137.0,

130.6, 129.8, 127.5, 120.5, 111.7, 111.1, 61.1, 55.8, 55.7 (2), 55.3, 48.4, 43.5, 32.8,

21.5, 21.2; HRMS *m/z* (ESI) calcd for C<sub>23</sub>H<sub>28</sub>NO<sub>6</sub>S ([M+H]<sup>+</sup>) 446.1632, found

446.1638.

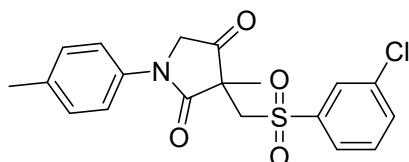

**3-(((3-Chlorophenyl)sulfonyl)methyl)-3-methyl-**

**1-(*p*-tolyl)pyrrolidine-2,4-dione (3z)**, white solid

(0.0659 g, 84% yield); <sup>1</sup>H NMR (400 MHz, CDCl<sub>3</sub>)

δ: 7.81 (t, *J* = 2.0 Hz, 1H), 7.73-7.71 (m, 1H), 7.61-7.59 (m, 1H), 7.53 (t, *J* = 4.4 Hz,

2H), 7.46 (t,  $J = 4.0$  Hz, 1H), 7.24 (d,  $J = 8.4$  Hz, 2H), 4.58 (d,  $J = 17.6$  Hz, 1H), 4.39 (d,  $J = 17.6$  Hz, 1H), 3.89 (d,  $J = 12.8$  Hz, 1H), 3.76 (d,  $J = 14.4$  Hz, 1H), 2.37 (s, 3H), 1.37 (s, 3H);  $^{13}\text{C}$  NMR (101 MHz,  $\text{CDCl}_3$ )  $\delta$ : 205.8, 170.9, 141.4, 135.8, 135.5, 135.1, 134.2, 130.6, 129.8, 127.8, 125.9, 120.9, 61.3, 56.4, 50.0, 21.6, 20.9; HRMS  $m/z$  (ESI) calcd for  $\text{C}_{19}\text{H}_{19}\text{ClNO}_4\text{S}$  ( $[\text{M}+\text{H}]^+$ ) 392.0718, found 392.0724.

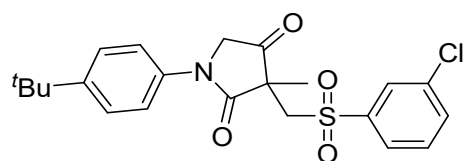

**1-(4-(*tert*-Butyl)phenyl)-3-(((3-chlorophenyl)sulfonyl)methyl)-3-methylpyrrolidine-2,4-dione (3aa)**, white

solid (0.0695 g, 80% yield);  $^1\text{H}$  NMR (400 MHz,  $\text{CDCl}_3$ )  $\delta$ : 7.81 (t,  $J = 2.0$  Hz, 1H), 7.72 (d,  $J = 2.8$  Hz, 1H), 7.60-7.58 (m, 3H), 7.46 (t,  $J = 4.4$  Hz, 3H), 4.60 (d,  $J = 17.2$  Hz, 1H), 4.41 (d,  $J = 17.6$  Hz, 1H), 3.91 (s, 1H), 3.76 (d,  $J = 14.8$  Hz, 1H), 1.37 (s, 3H), 1.34 (s, 9H);  $^{13}\text{C}$  NMR (101 MHz,  $\text{CDCl}_3$ )  $\delta$ : 205.8, 170.9, 149.0, 141.6, 135.2, 134.3, 130.7, 128.9, 127.9, 126.2, 126.0, 120.6, 61.4, 56.3, 50.1, 34.5, 31.3, 21.6; HRMS  $m/z$  (ESI) calcd for  $\text{C}_{22}\text{H}_{25}\text{ClNO}_4\text{S}$  ( $[\text{M}+\text{H}]^+$ ) 434.1187, found 434.1183.

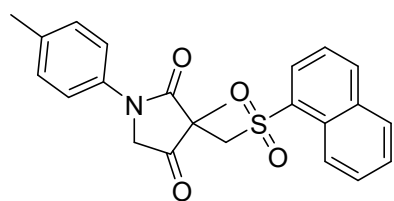

**3-Methyl-3-((naphthalen-1-ylsulfonyl)methyl)-1-(*p*-tolyl)pyrrolidine-2,4-dione (3ab)**, white solid (0.0677 g, 83% yield);  $^1\text{H}$  NMR (400 MHz,  $\text{CDCl}_3$ )  $\delta$ :

8.35 (s, 1H), 7.98-7.89 (m, 3H), 7.82-7.79 (m, 2H), 7.66 (t,  $J = 7.6$  Hz, 1H), 7.51 (d,  $J = 8.4$  Hz, 2H), 7.19 (d,  $J = 8.4$  Hz, 2H), 4.65 (d,  $J = 17.2$  Hz, 1H), 4.40 (d,  $J = 17.6$  Hz, 1H), 3.95 (d,  $J = 14.4$  Hz, 1H), 3.80 (d,  $J = 14.4$  Hz, 1H), 2.37 (s, 3H), 1.36 (s, 3H);  $^{13}\text{C}$  (101 MHz,  $\text{CDCl}_3$ )  $\delta$ : 206.0, 170.8, 136.4, 135.5, 135.3 (2), 131.1, 129.8 (2),

129.7, 129.5, 129.4, 127.9, 127.6, 122.1, 120.7, 61.5, 56.4, 49.8, 21.6, 20.9; HRMS  $m/z$  (ESI) calcd for  $C_{23}H_{22}NO_4S$  ( $[M+H]^+$ ) 408.1264, found 408.1260.

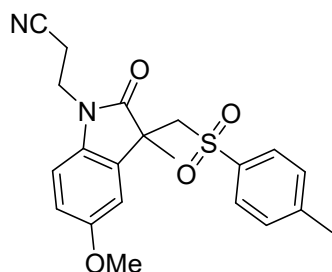

**3-(5-Methoxy-3-methyl-2-oxo-3-(tosylmethyl)indolin-**

**1-yl)propanenitrile (4a)**, yellow oil (0.0510 g, 85%

yield);  $^1H$  NMR (400 MHz,  $CDCl_3$ )  $\delta$ : 7.29 (t,  $J = 4.0$  Hz, 2H), 7.11 (d,  $J = 8.0$  Hz, 2H), 6.91 (d,  $J = 8.4$  Hz, 1H),

6.77-6.74 (m, 1H), 6.21 (d,  $J = 2.4$  Hz, 1H), 4.22-4.15 (m, 1H), 3.92-3.88 (m, 2H),

3.71 (d,  $J = 14.8$  Hz, 1H), 3.56 (s, 3H), 2.89-2.84 (m, 2H), 2.37 (s, 3H), 1.34 (s, 3H);

$^{13}C$  NMR (101 MHz,  $CDCl_3$ )  $\delta$ : 177.4, 155.8, 144.1, 136.8, 134.6, 130.0, 129.4, 127.4,

118.0, 113.1, 110.4, 108.9, 61.9, 55.0, 45.5, 36.0, 25.1, 21.3, 15.7; HRMS  $m/z$  (ESI)

calcd for  $C_{21}H_{23}N_2O_4S$  ( $[M+H]^+$ ) 399.1373, found 399.1377.

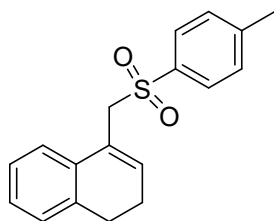

**4-(Tosylmethyl)-1,2-dihydronaphthalene (5a)**,<sup>[1]</sup> (0.0533 g,

89% yield);  $^1H$  NMR (500 MHz,  $CDCl_3$ )  $\delta$ : 7.78 (d,  $J = 8.5$  Hz,

2H), 7.29 (t,  $J = 4.0$  Hz, 5H), 7.25-7.22 (m, 1H), 5.58-5.54 (m,

1H), 4.11 (t,  $J = 7.0$  Hz, 2H), 2.58-2.54 (m, 2H), 2.42 (s, 3H), 1.98 (s, 2H);  $^{13}C$  NMR

(126 MHz,  $CDCl_3$ )  $\delta$ : 144.7, 143.1, 138.5, 133.2, 129.8, 128.2, 127.9, 127.0, 125.6,

121.3, 69.6, 28.5, 21.6, 16.0.

### (C) Reference

[1] P. Chen, Q. Zhou, Z. Chen, Y.-K. Liu, K.-W. Tang and Y. Liu, *Org. Biomol. Chem.*, 2020, **18**, 7345.

(D) Spectra

3-Methyl-1-phenyl-3-(tosylmethyl)pyrrolidine-2,4-dione (3a)

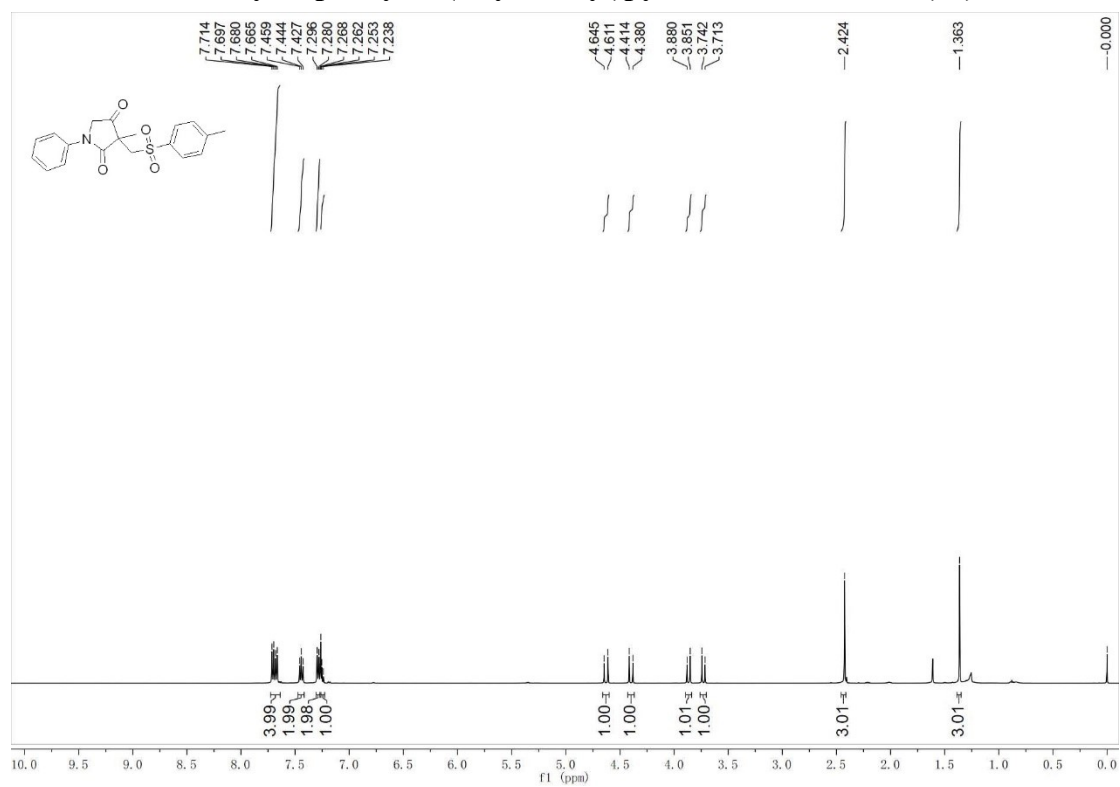

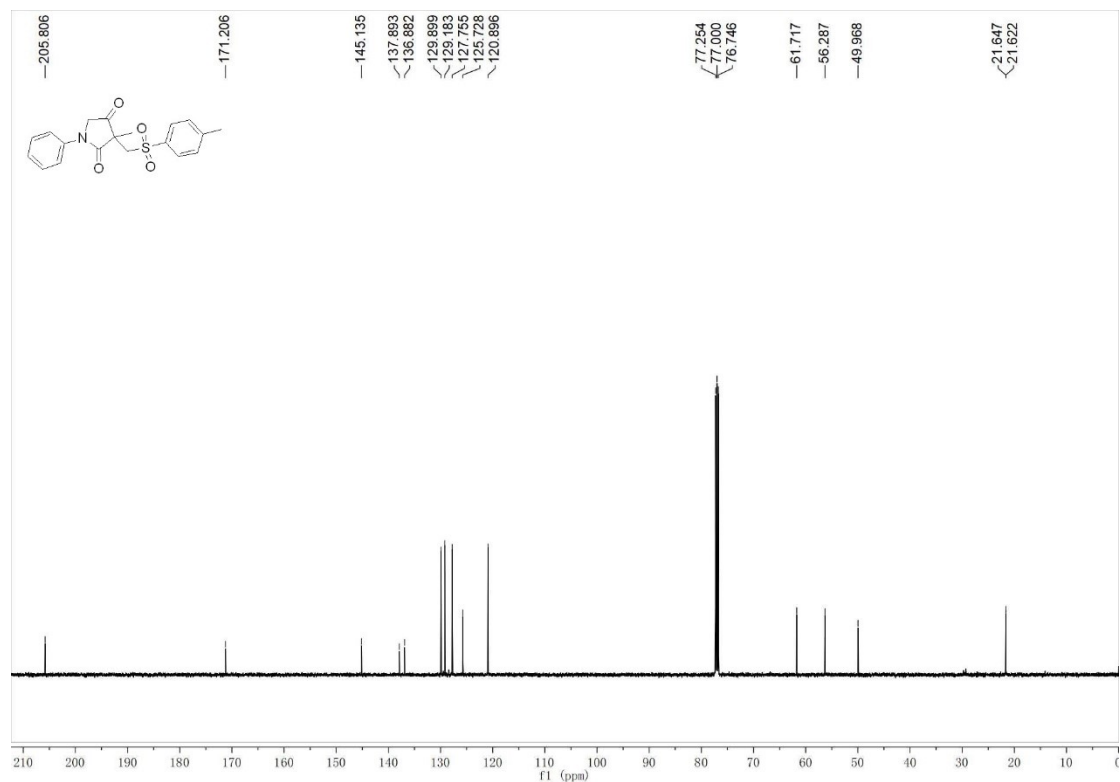

**3-(((4-(*tert*-Butyl)phenyl)sulfonyl)methyl)-3-methyl-1-phenylpyrrolidine-2,4-dione (3b)**

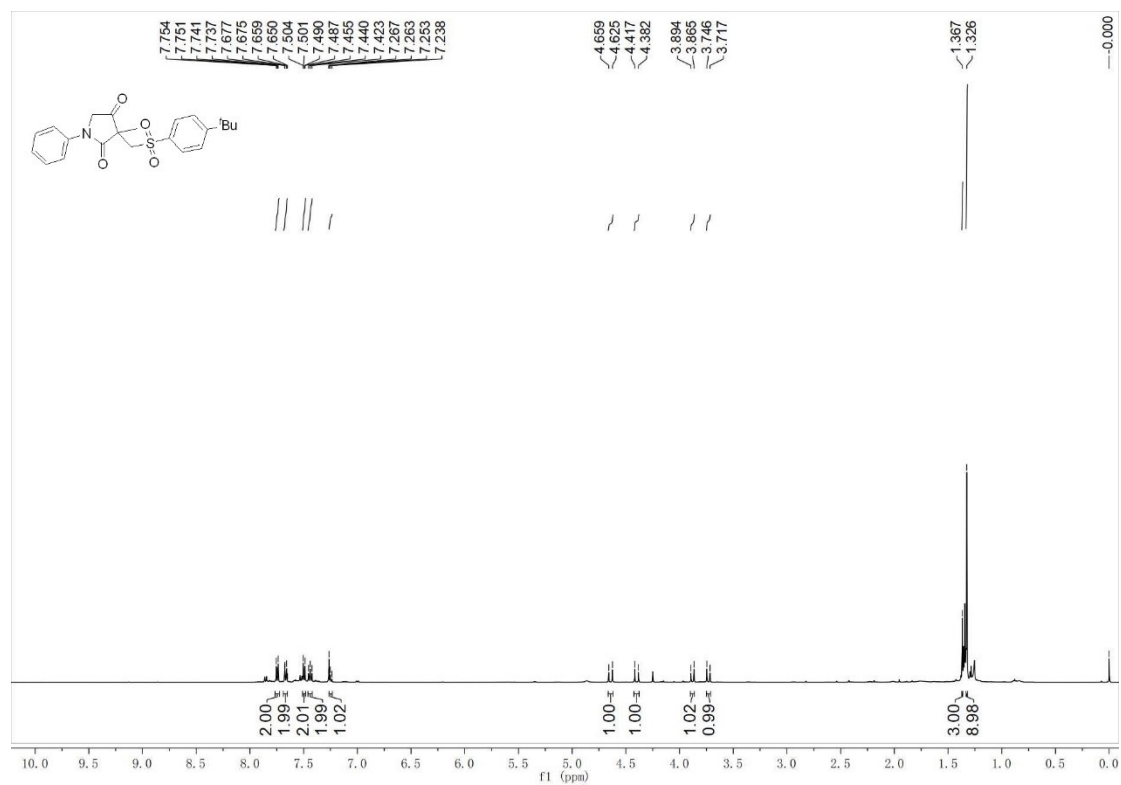

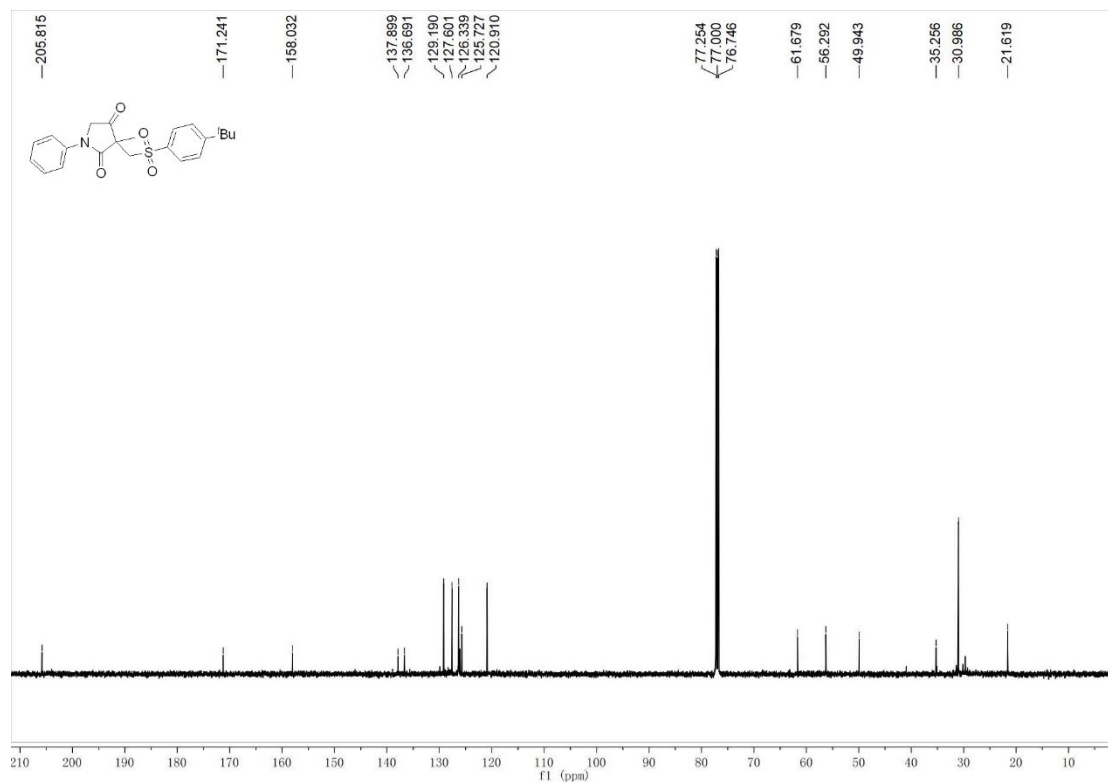

**3-(((4-Methoxyphenyl)sulfonyl)methyl)-3-methyl-1-phenylpyrrolidine-2,4-dione (3c)**

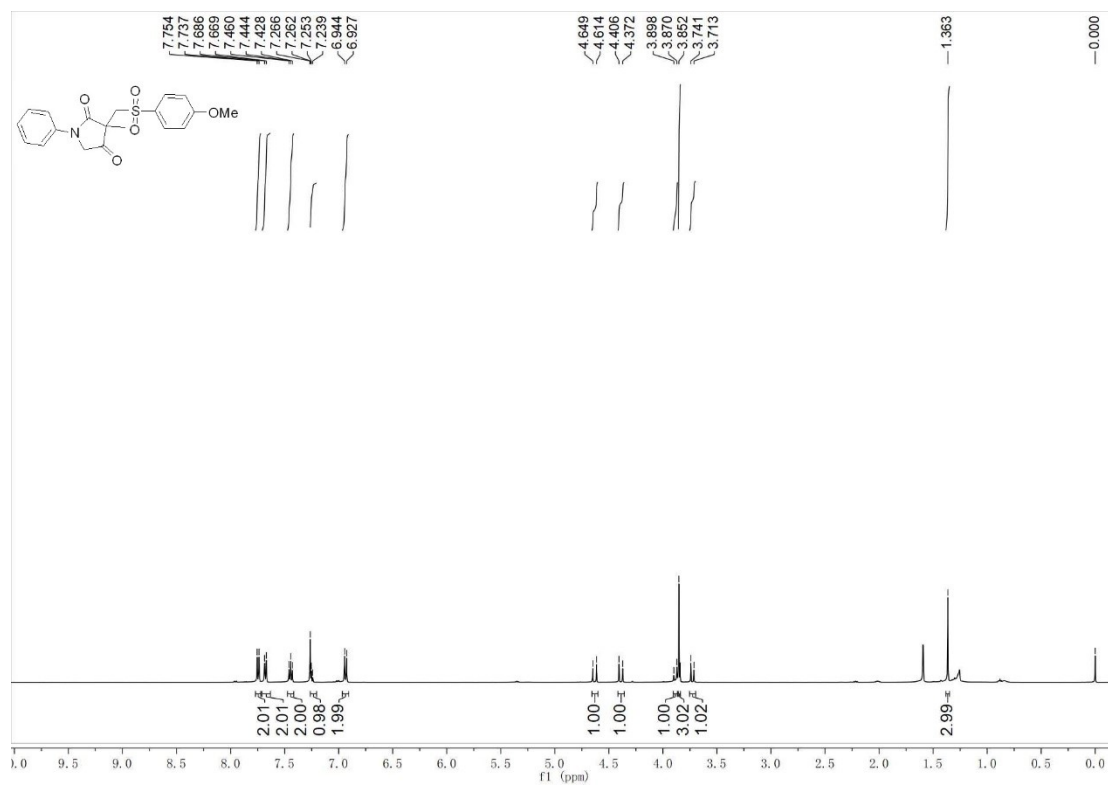



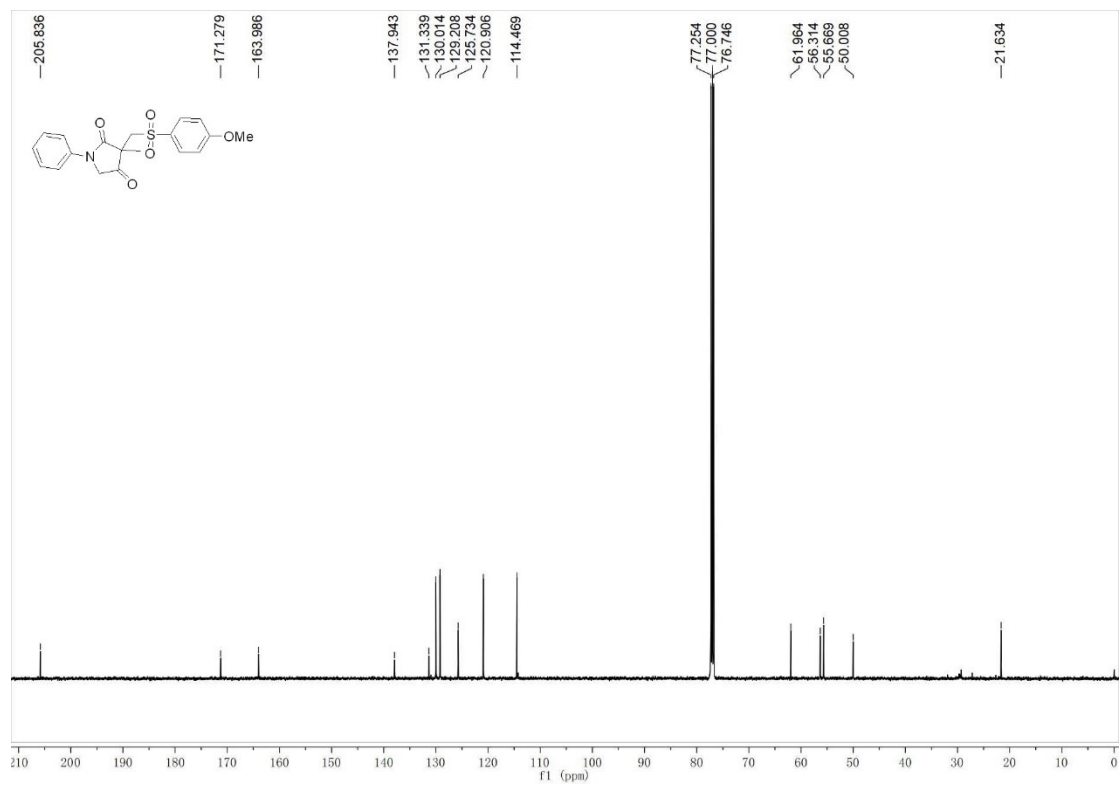

### 3-Methyl-1-phenyl-3-((phenylsulfonyl)methyl)pyrrolidine-2,4-dione (3d)

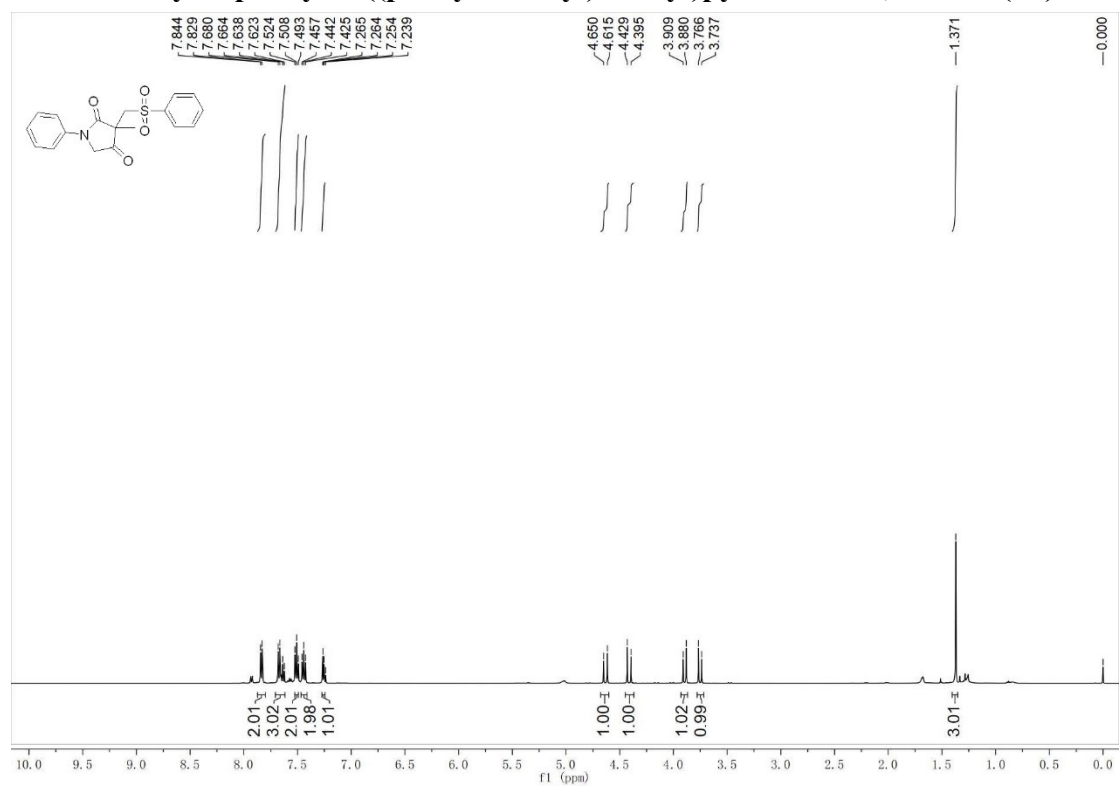

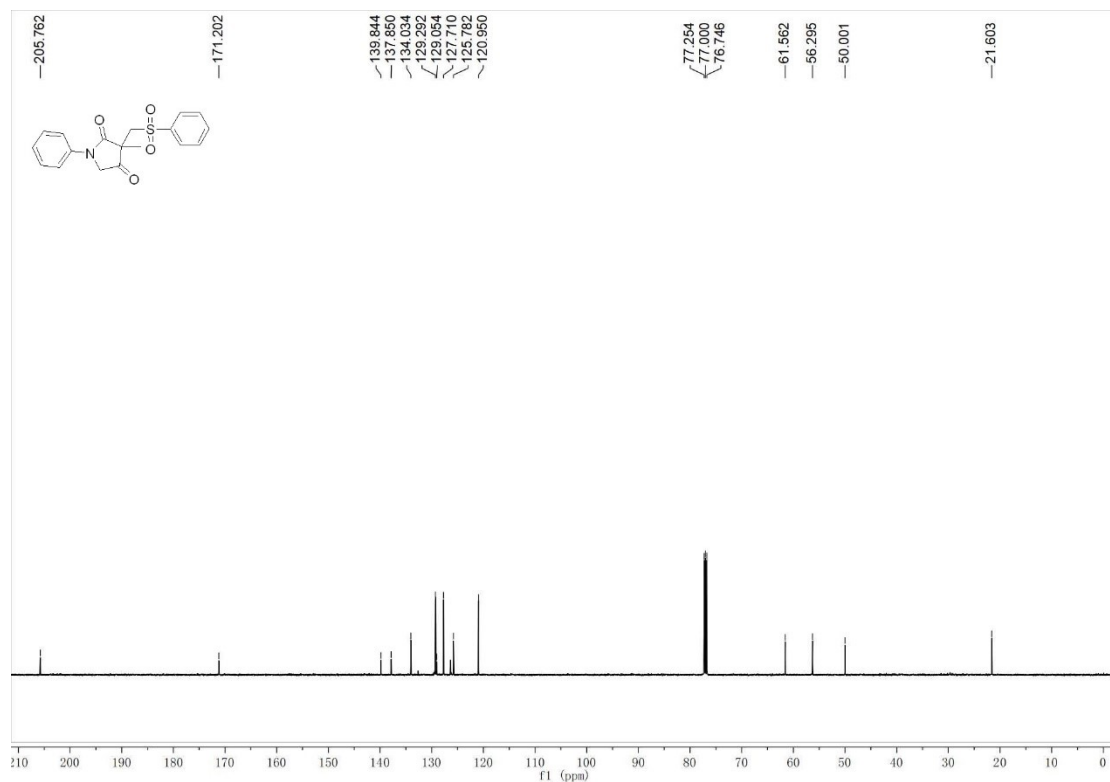

**3-(((4-Bromophenyl)sulfonyl)methyl)-3-methyl-1-phenylpyrrolidine-2,4-dione  
(3e)**

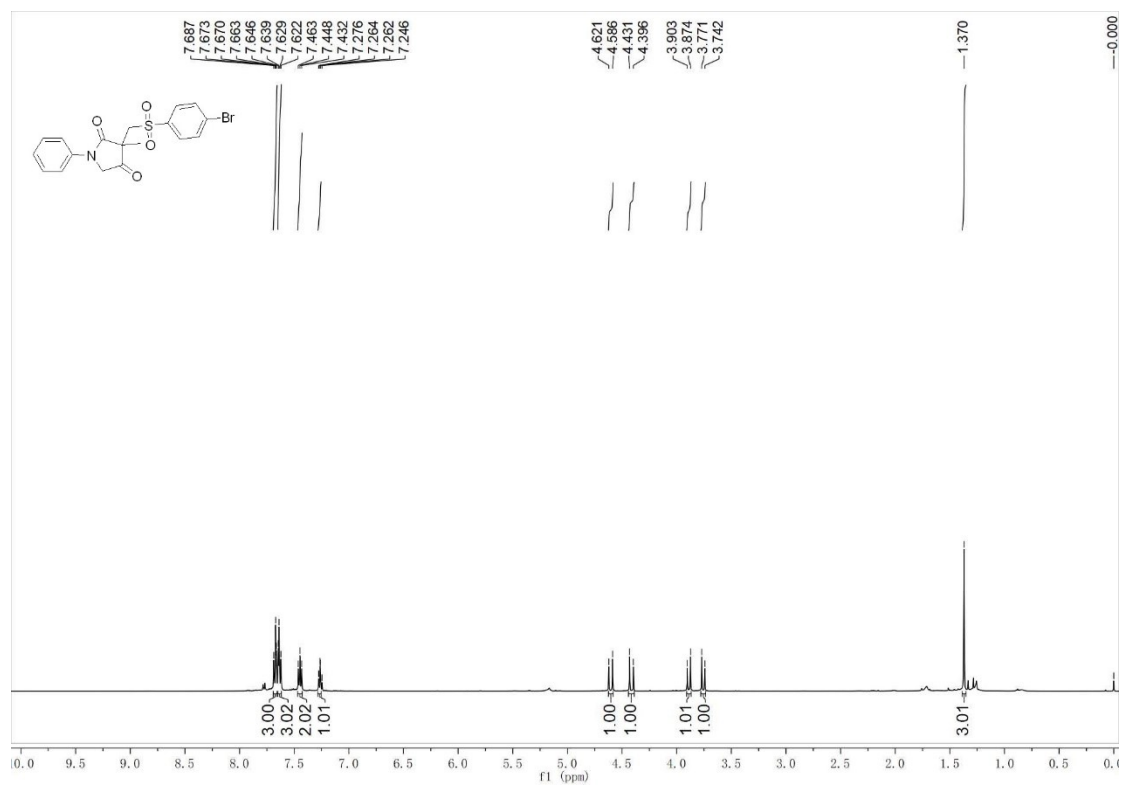

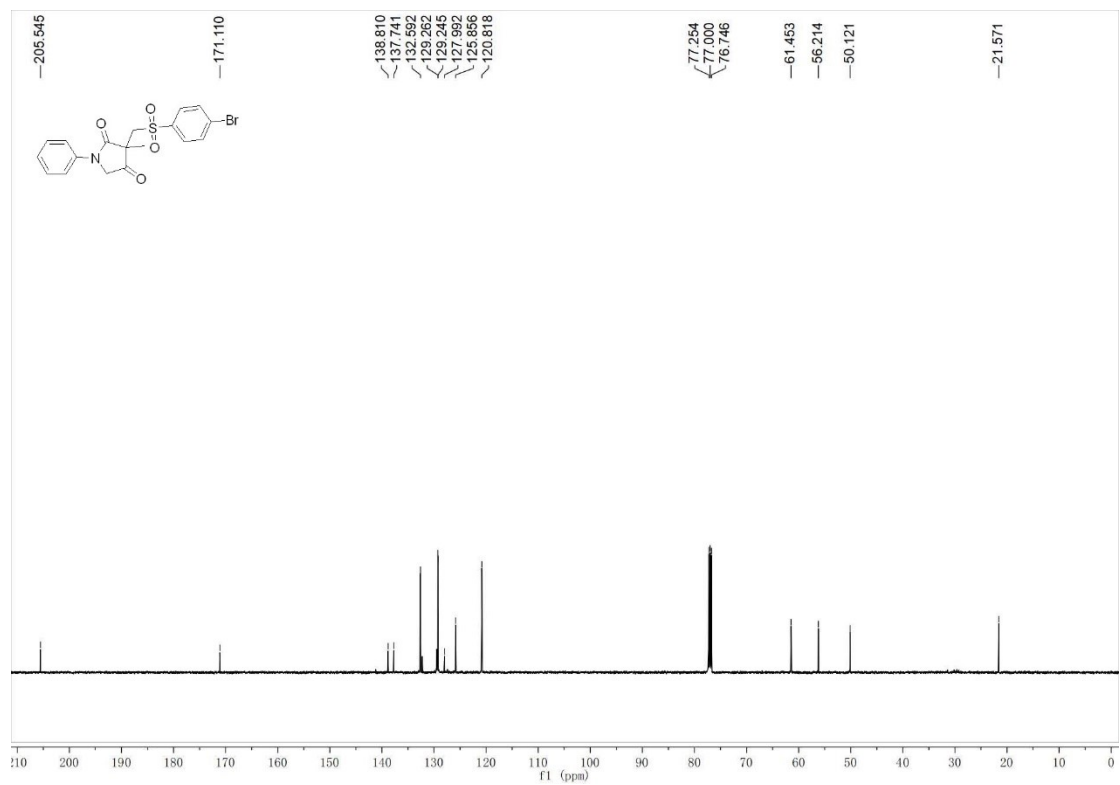

**3-(((4-Chlorophenyl)sulfonyl)methyl)-3-methyl-1-phenylpyrrolidine-2,4-dione (3f)**

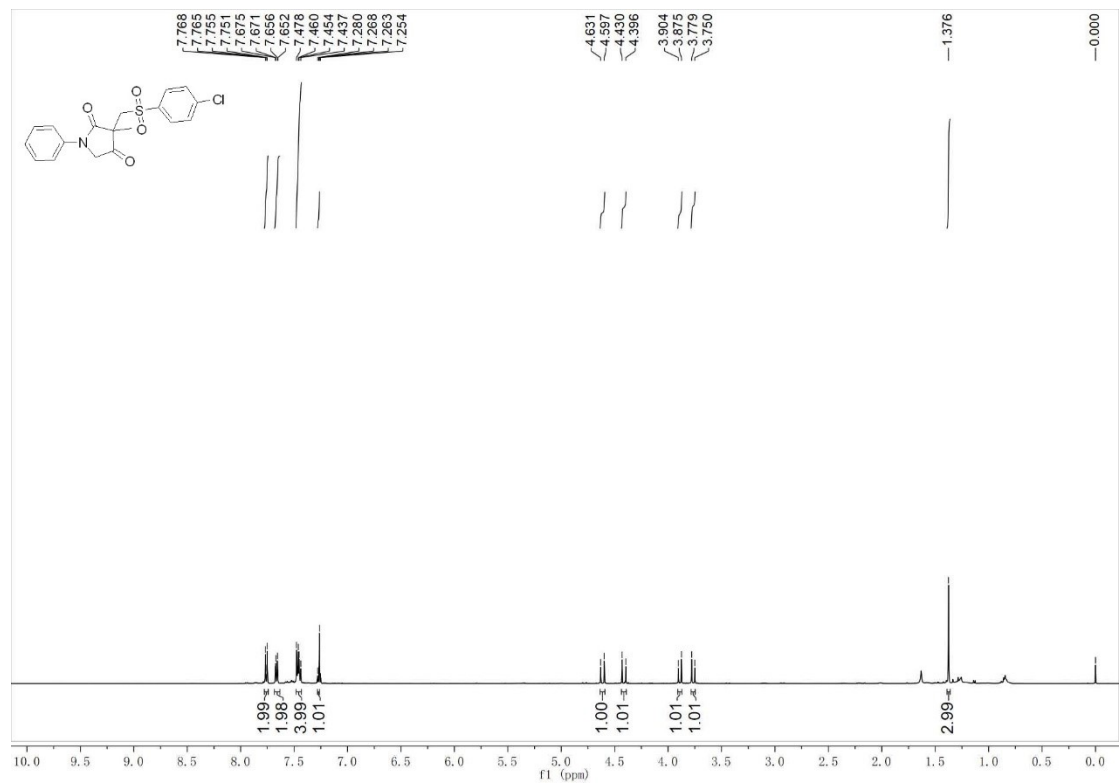

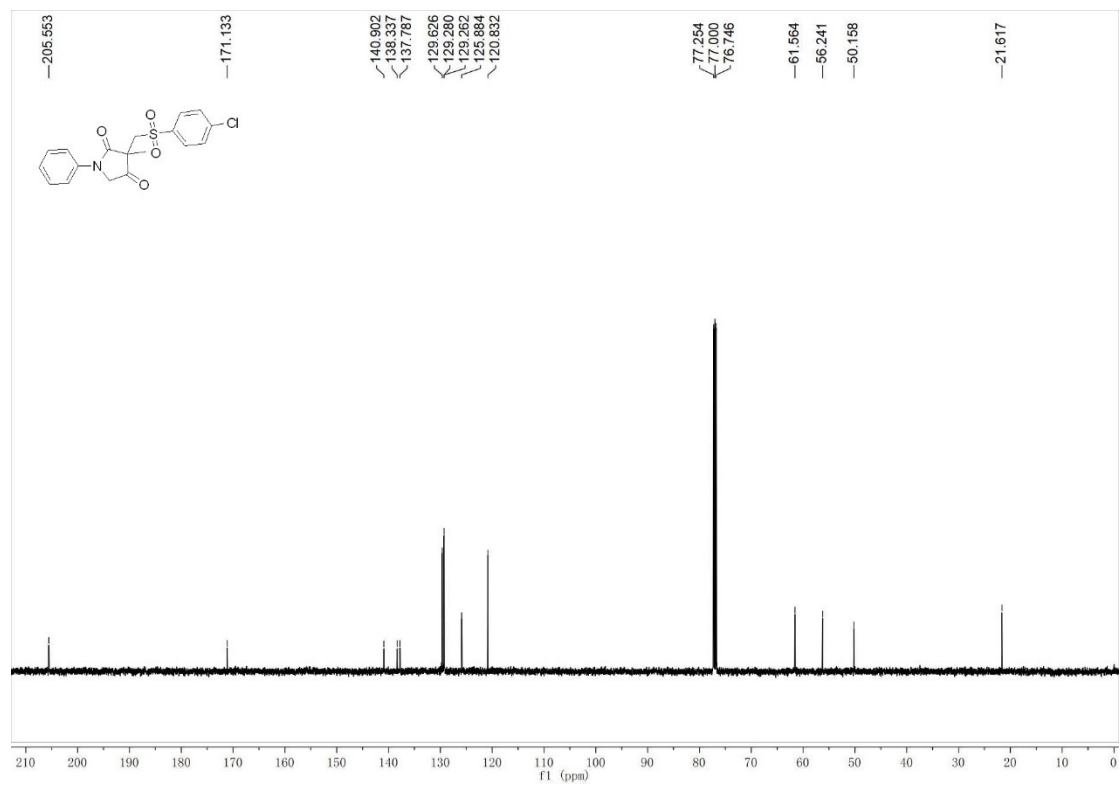

**3-(((4-Fluorophenyl)sulfonyl)methyl)-3-methyl-1-phenylpyrrolidine-2,4-dione  
(3g)**

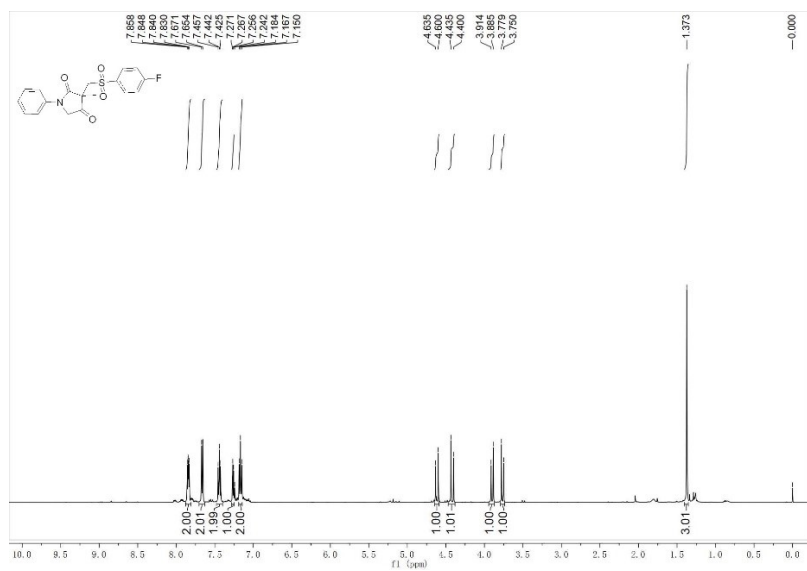

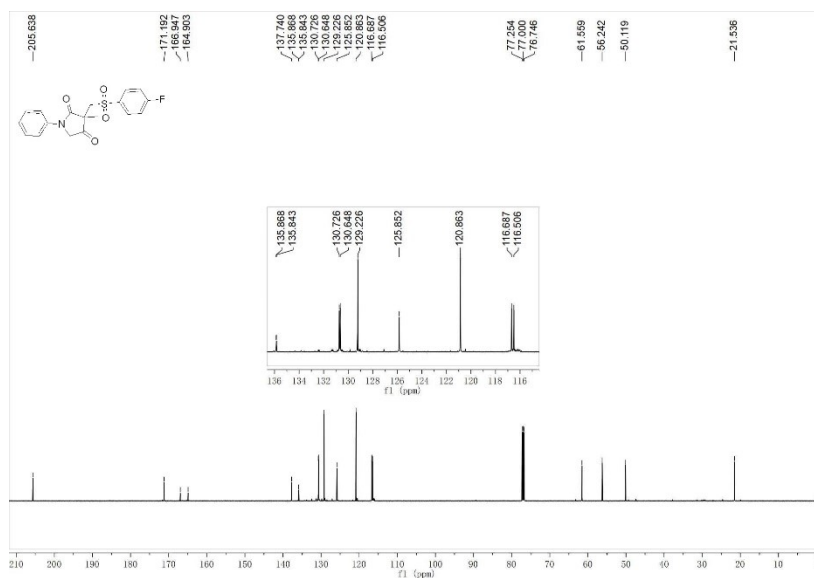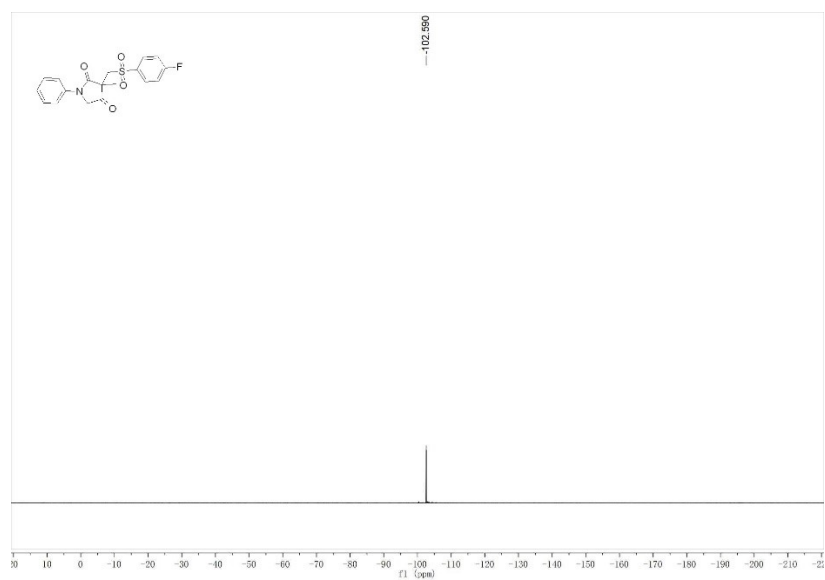

**4-(((3-Methyl-2,4-dioxo-1-phenylpyrrolidin-3-yl)methyl)sulfonyl)benzonitrile (3h)**

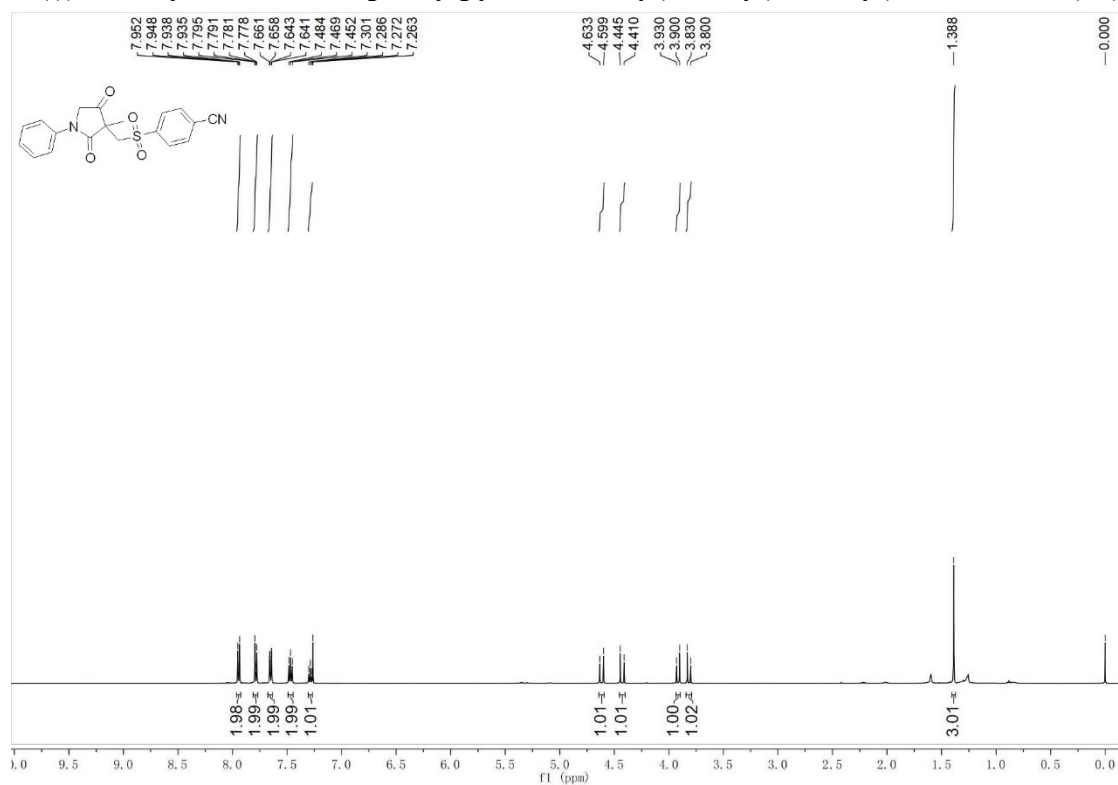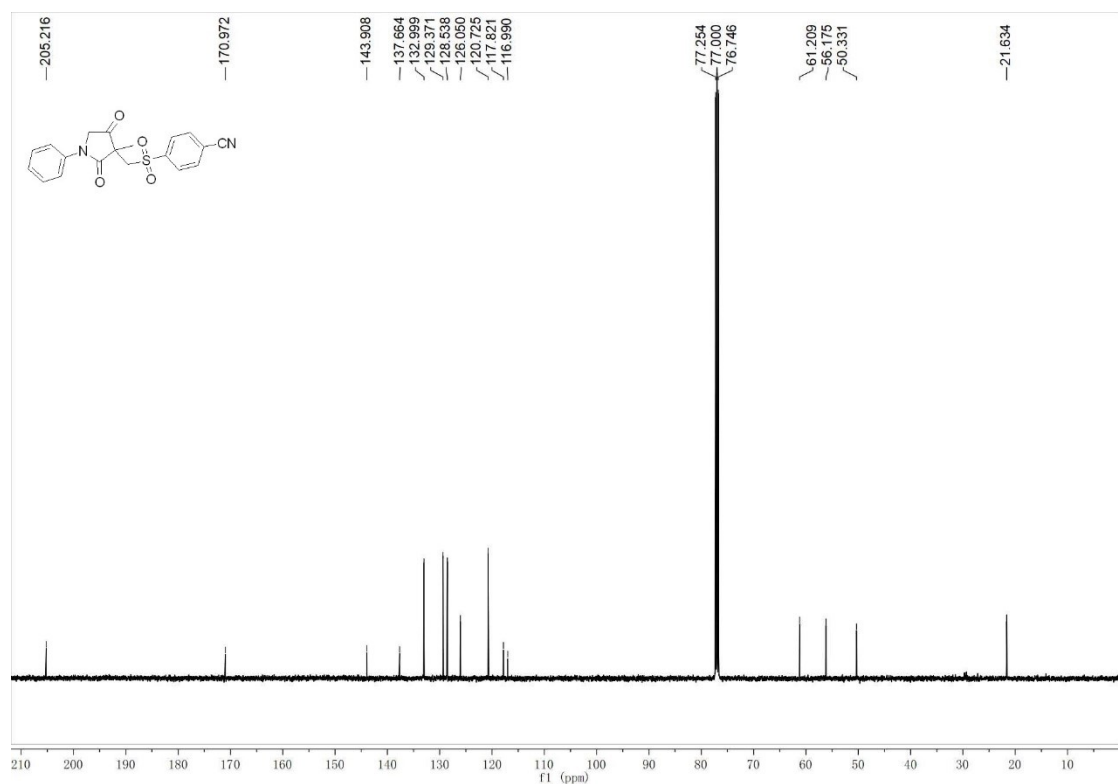

**3-(((3-Chlorophenyl)sulfonyl)methyl)-3-methyl-1-phenylpyrrolidine-2,4-dione (3i)**

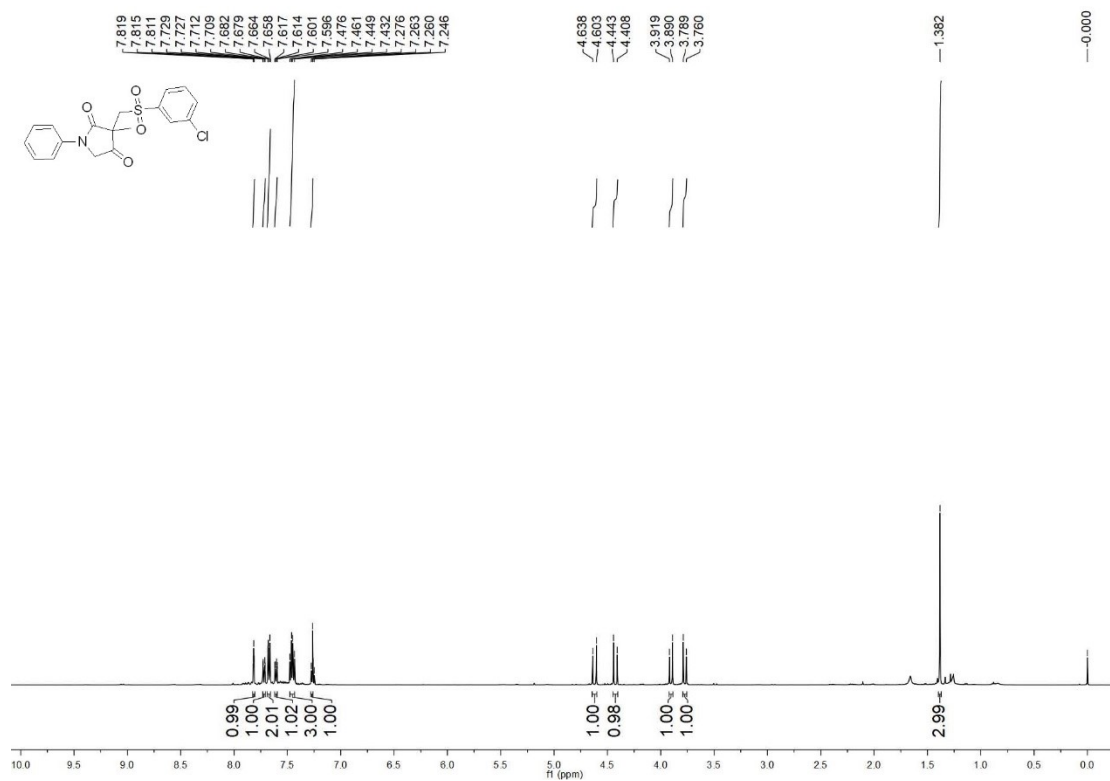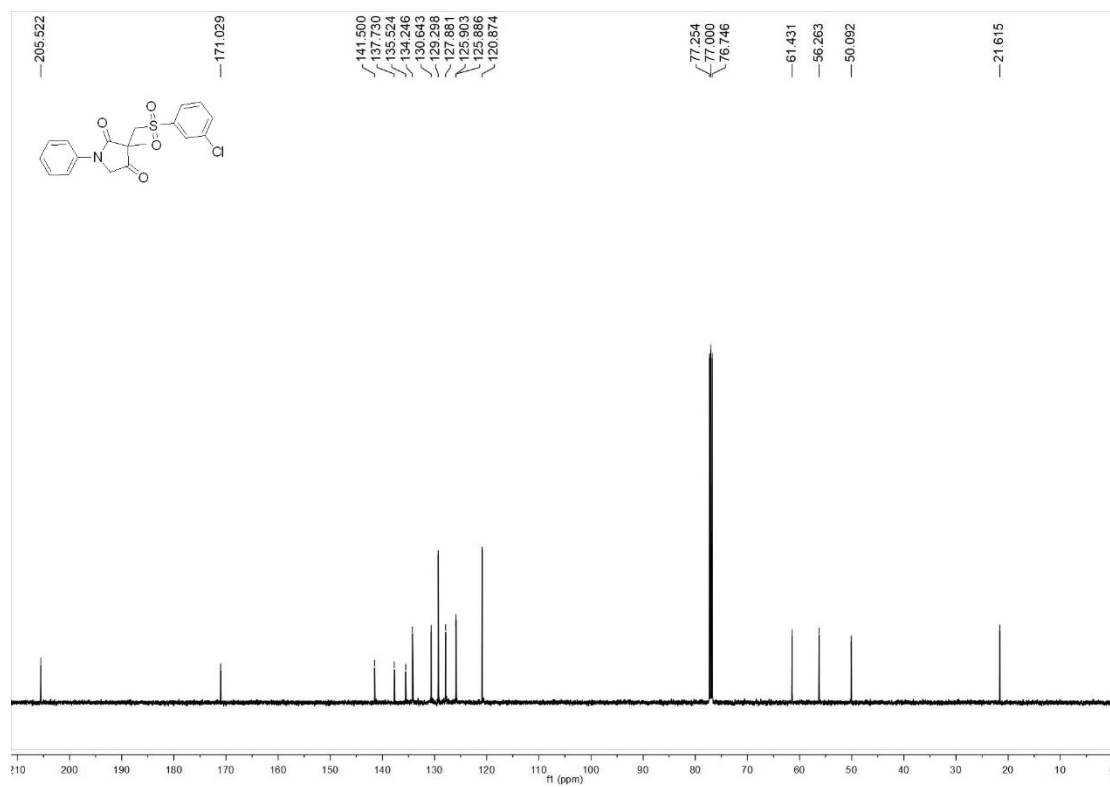

**3-(((2-Chlorophenyl)sulfonyl)methyl)-3-methyl-1-phenylpyrrolidine-2,4-dione (3j)**

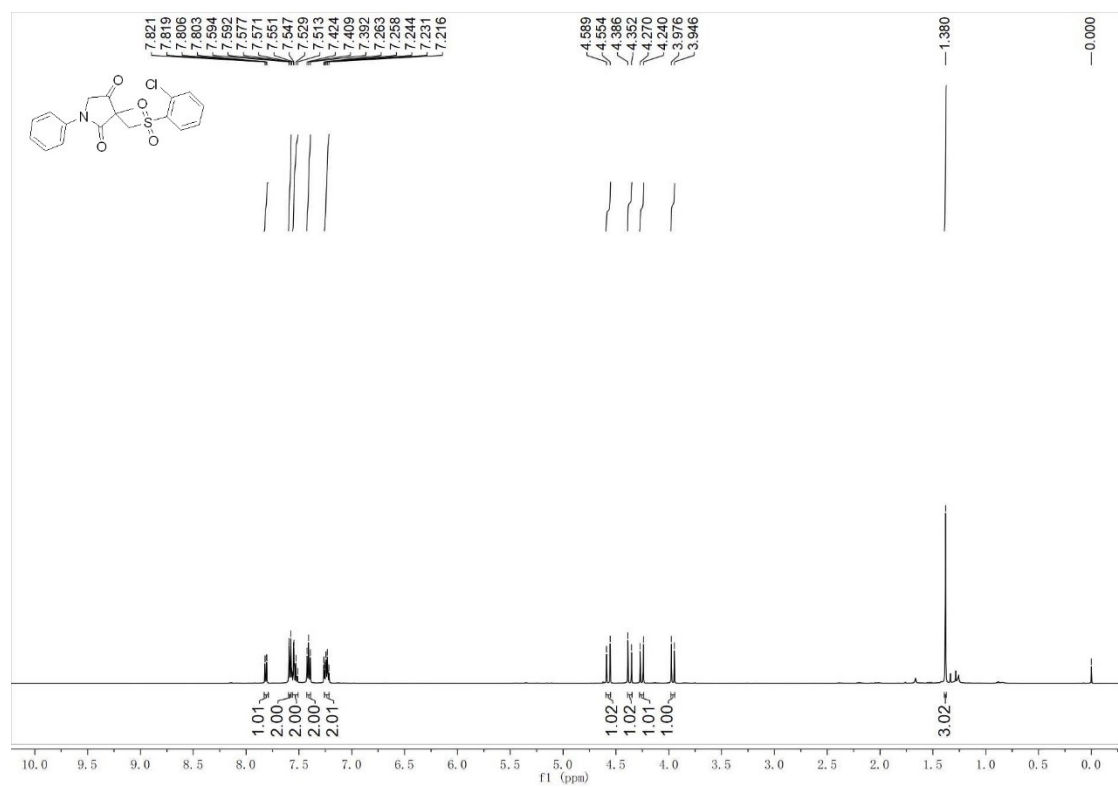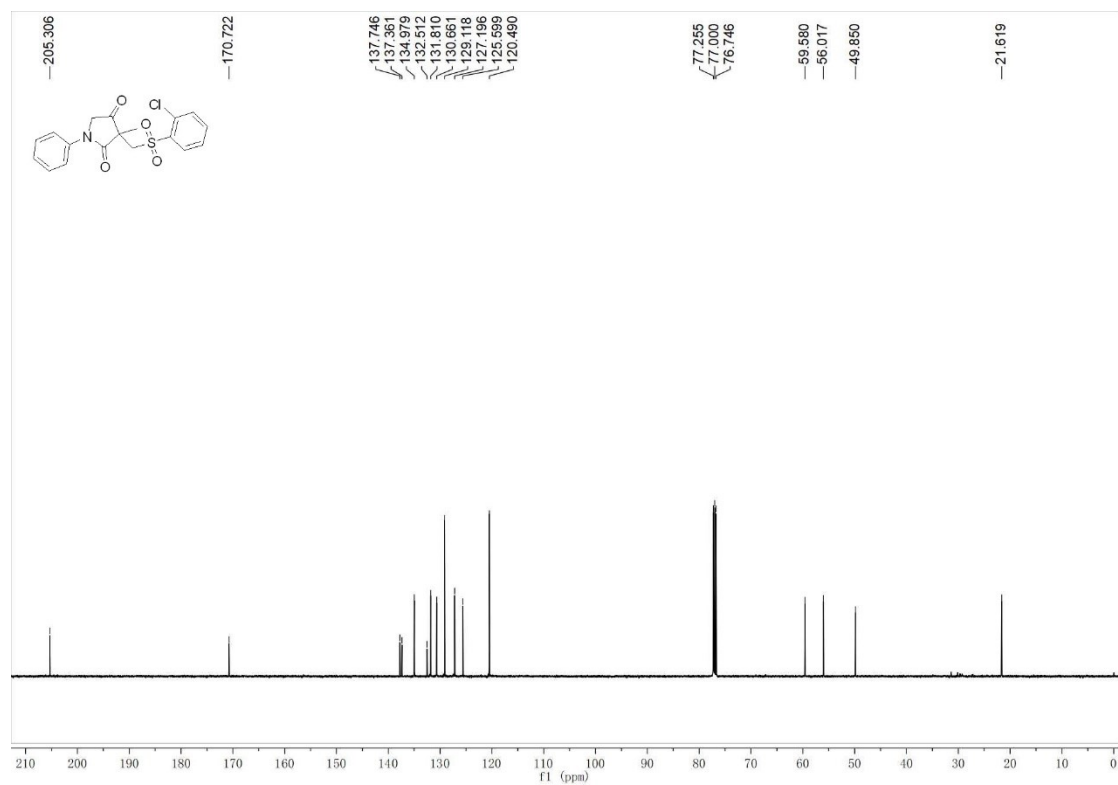

**3-Methyl-3-((naphthalen-1-ylsulfonyl)methyl)-1-phenylpyrrolidine-2,4-dione (3k)**



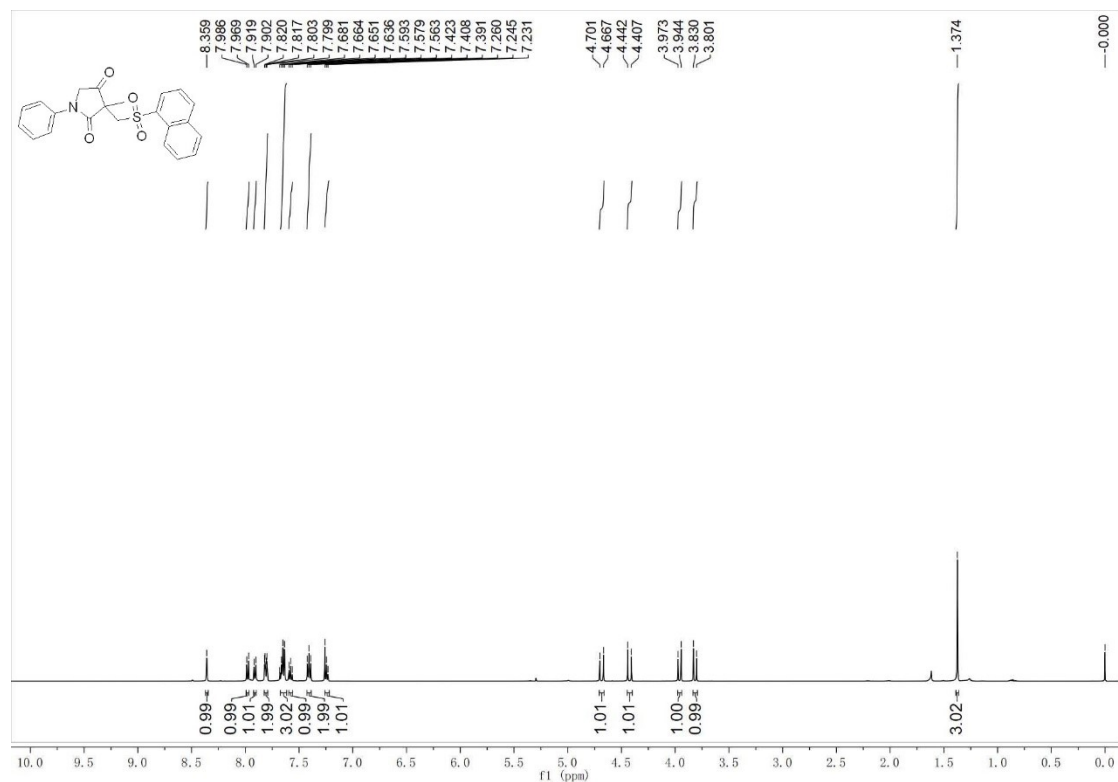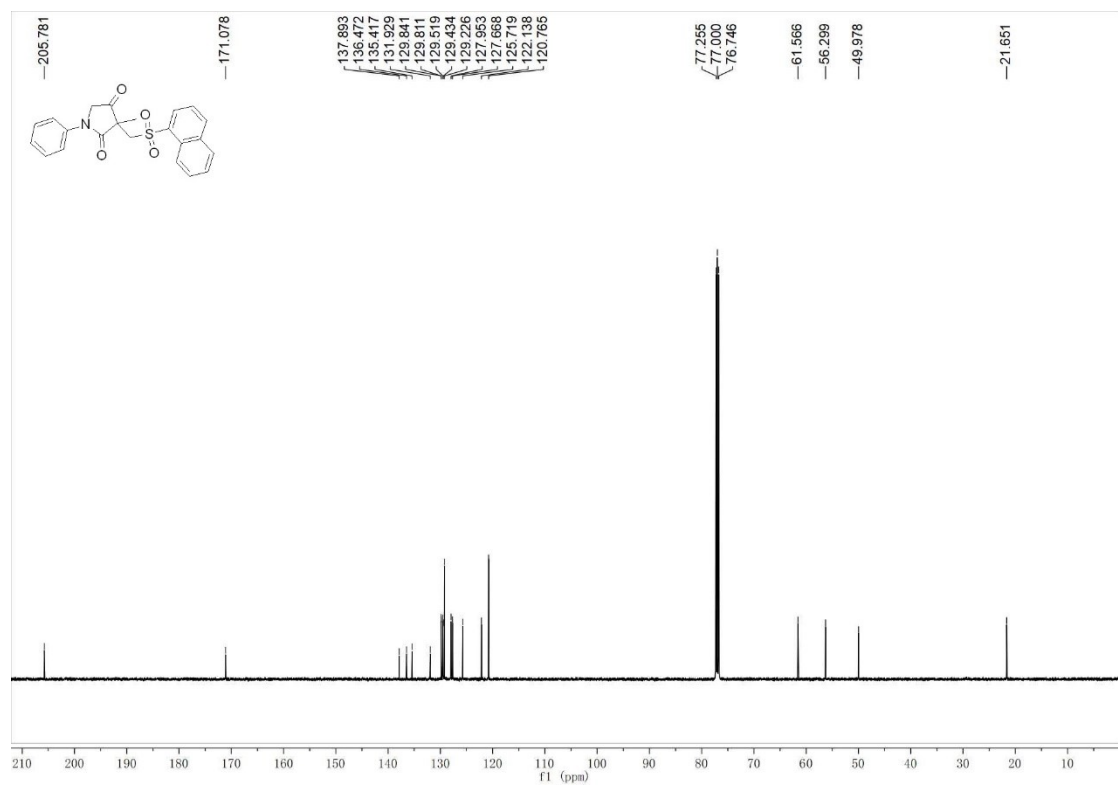

**3-Methyl-1-(*p*-tolyl)-3-(tosylmethyl)pyrrolidine-2,4-dione (3m)**

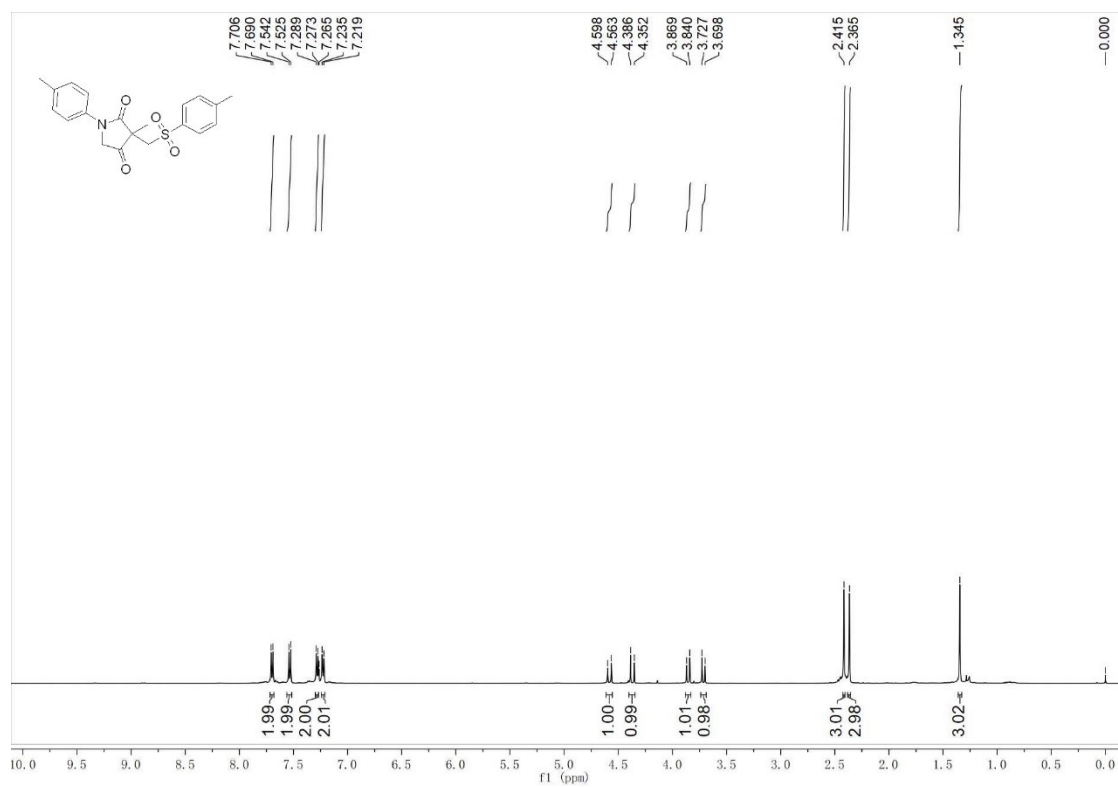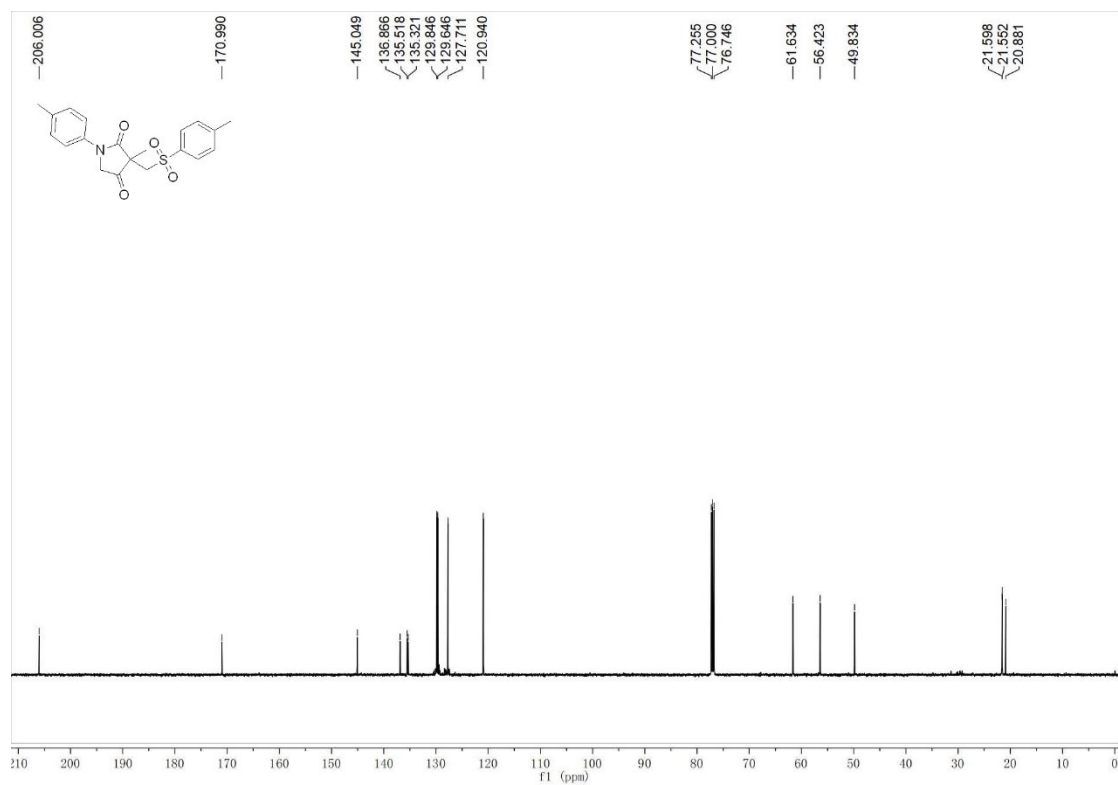

**1-(4-(*tert*-Butyl)phenyl)-3-methyl-3-(tosylmethyl)pyrrolidine-2,4-dione (3n)**

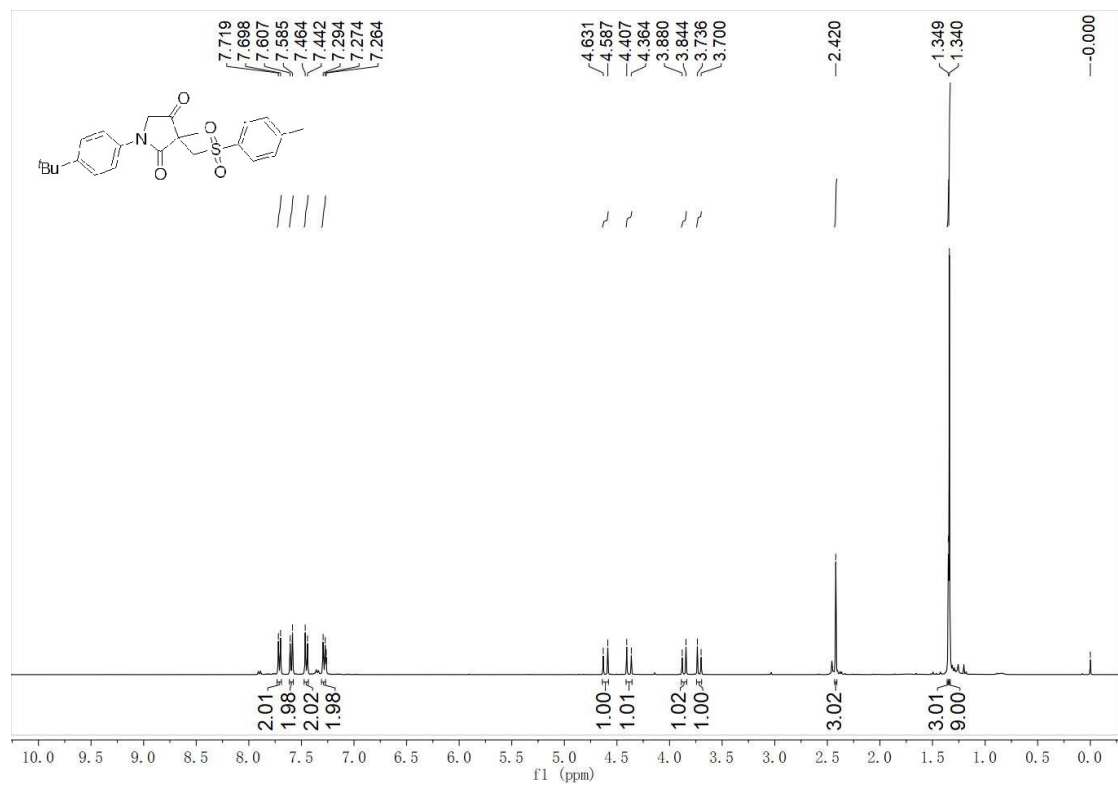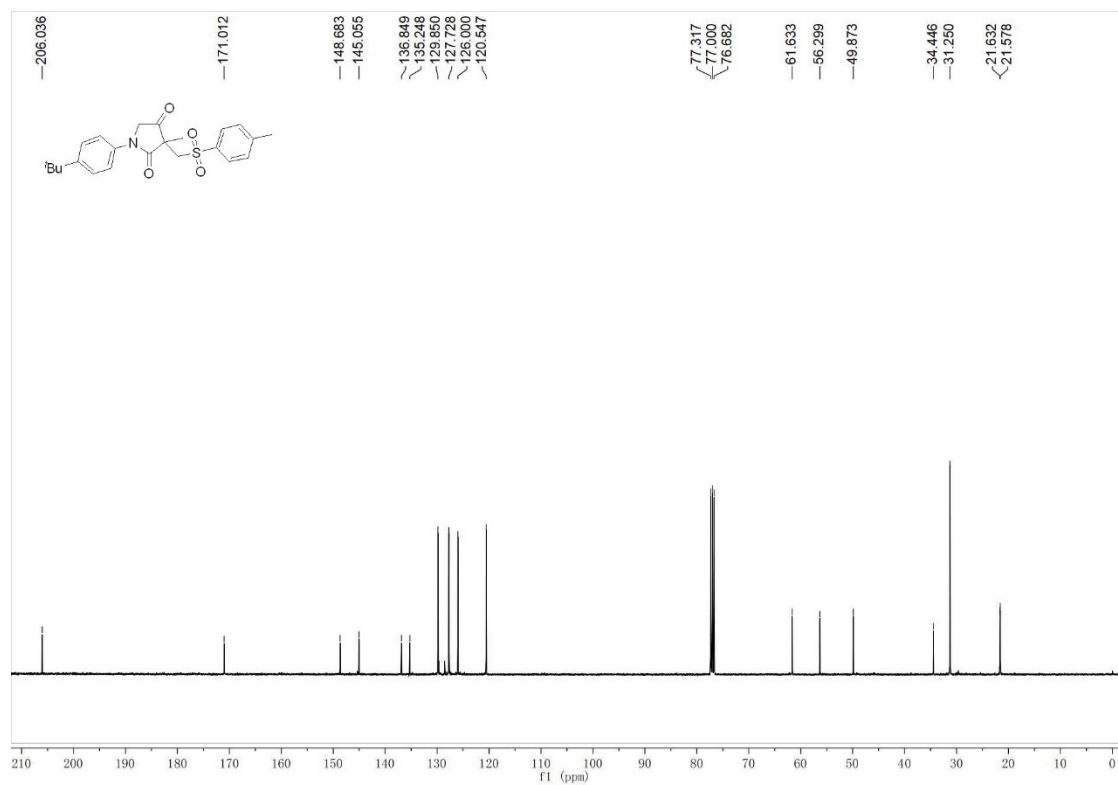

**1-(4-Methoxyphenyl)-3-methyl-3-(tosylmethyl)pyrrolidine-2,4-dione (3o)**

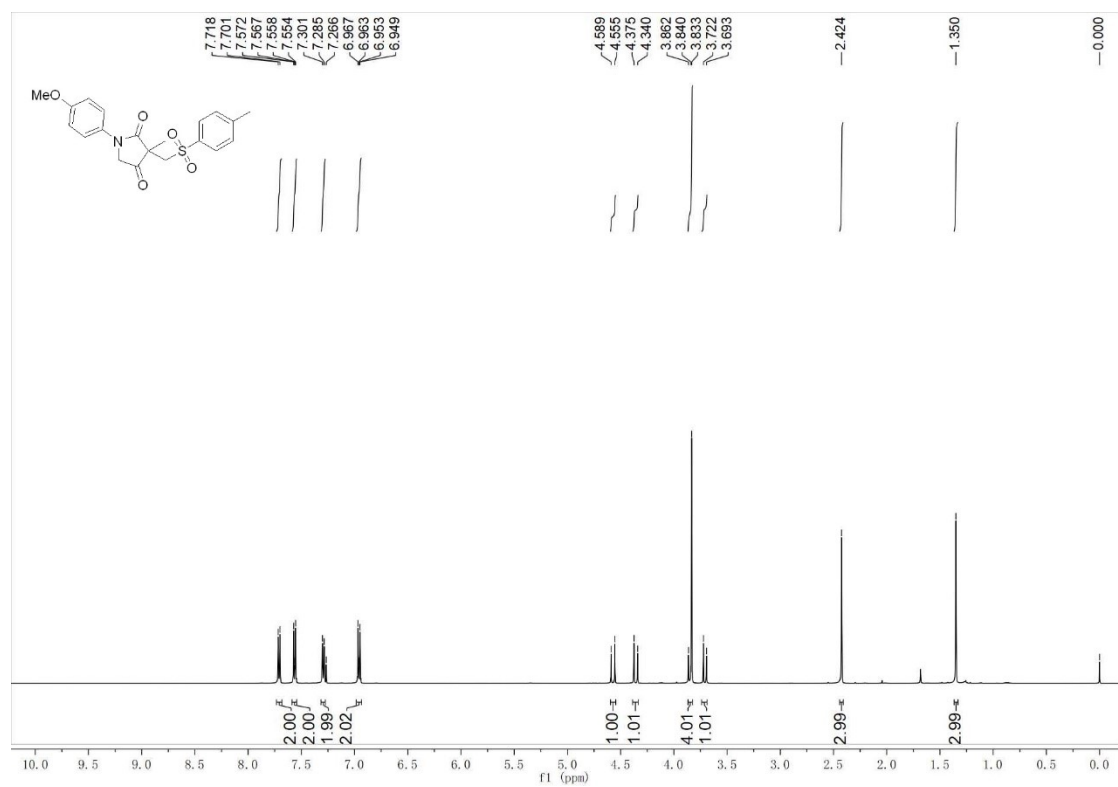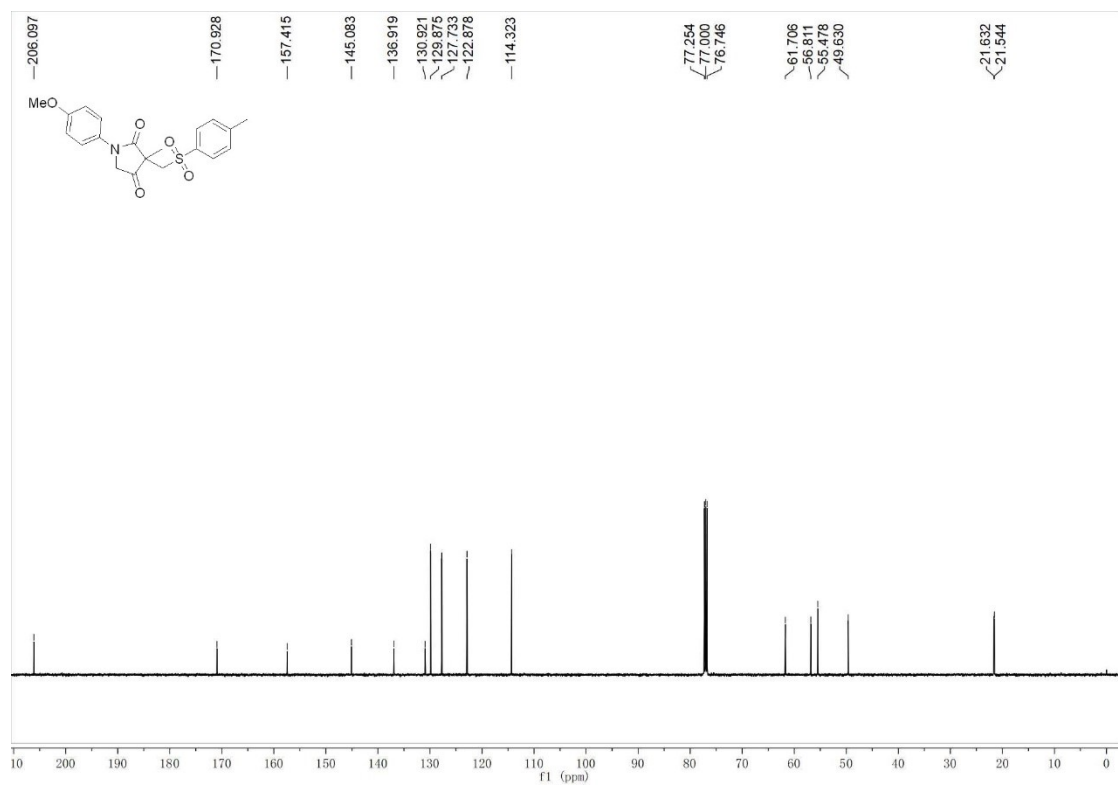

**1-(4-Bromophenyl)-3-methyl-3-(tosylmethyl)pyrrolidine-2,4-dione (3p)**

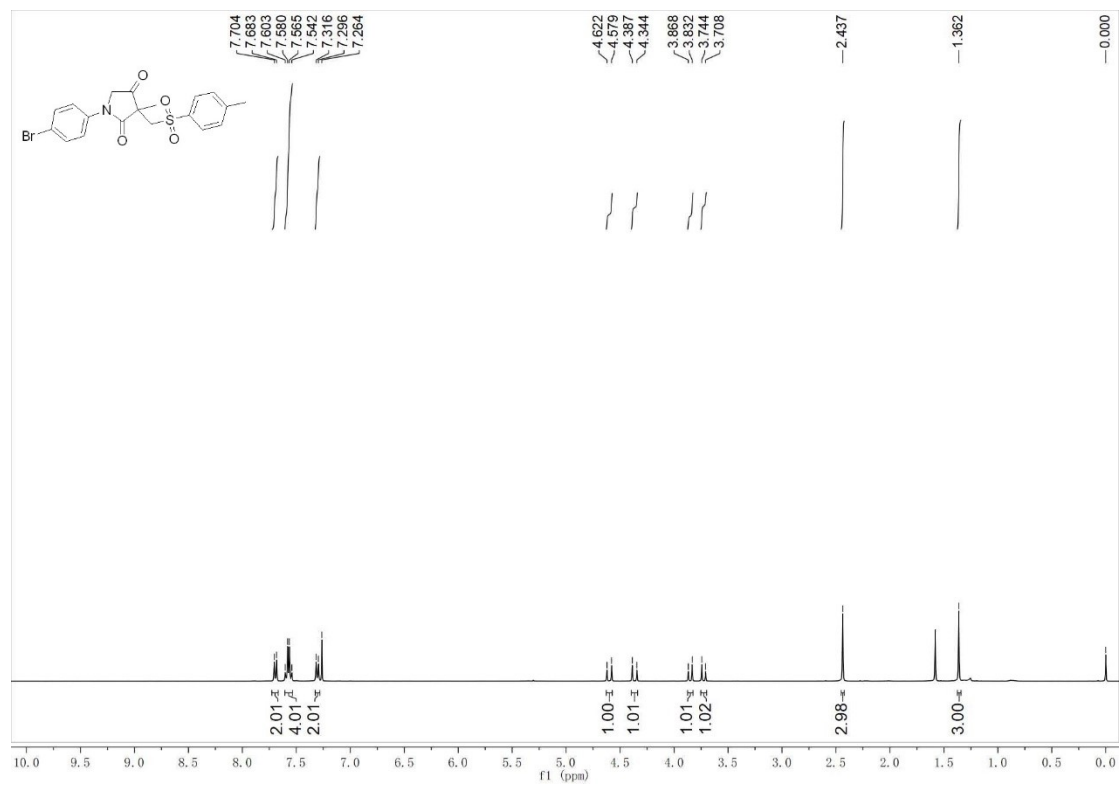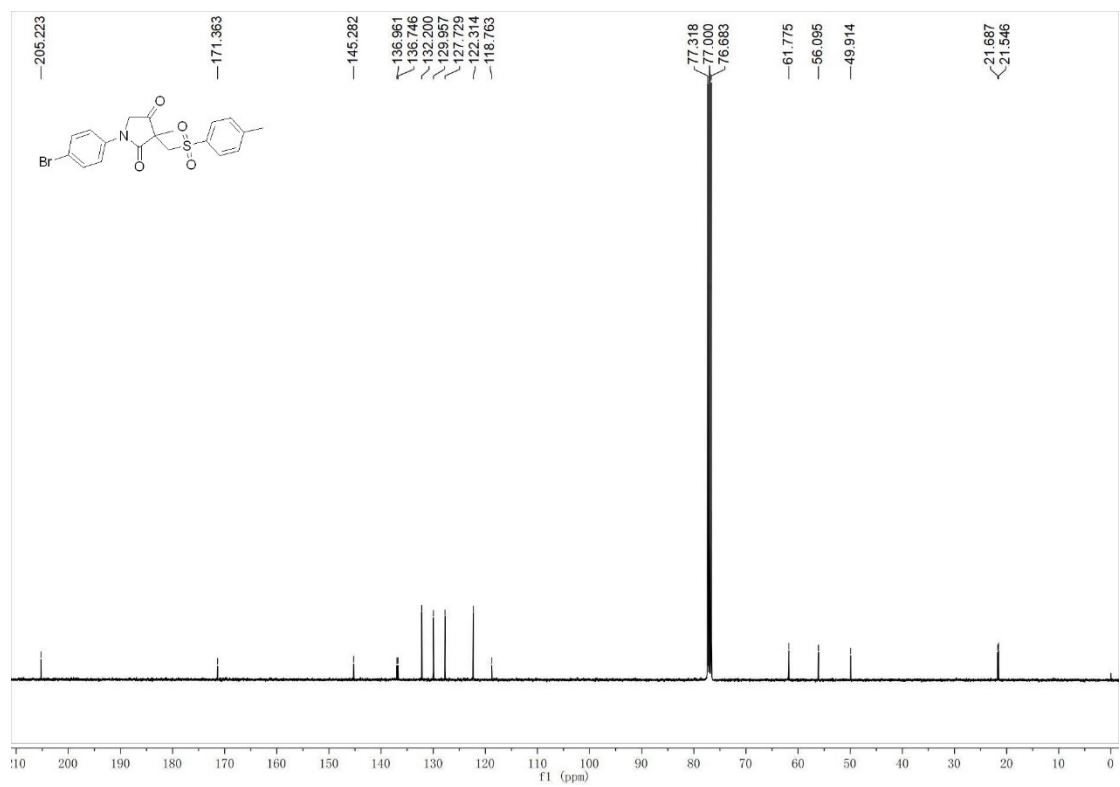

**1-(4-Chlorophenyl)-3-methyl-3-(tosylmethyl)pyrrolidine-2,4-dione (3q)**

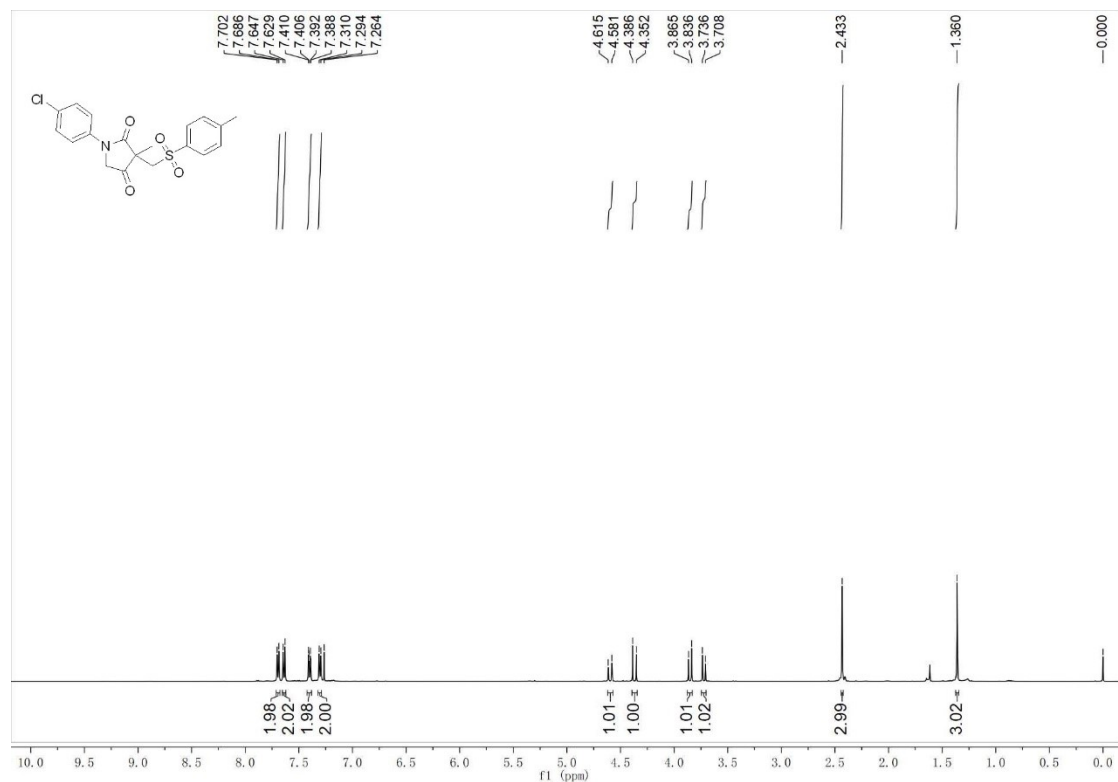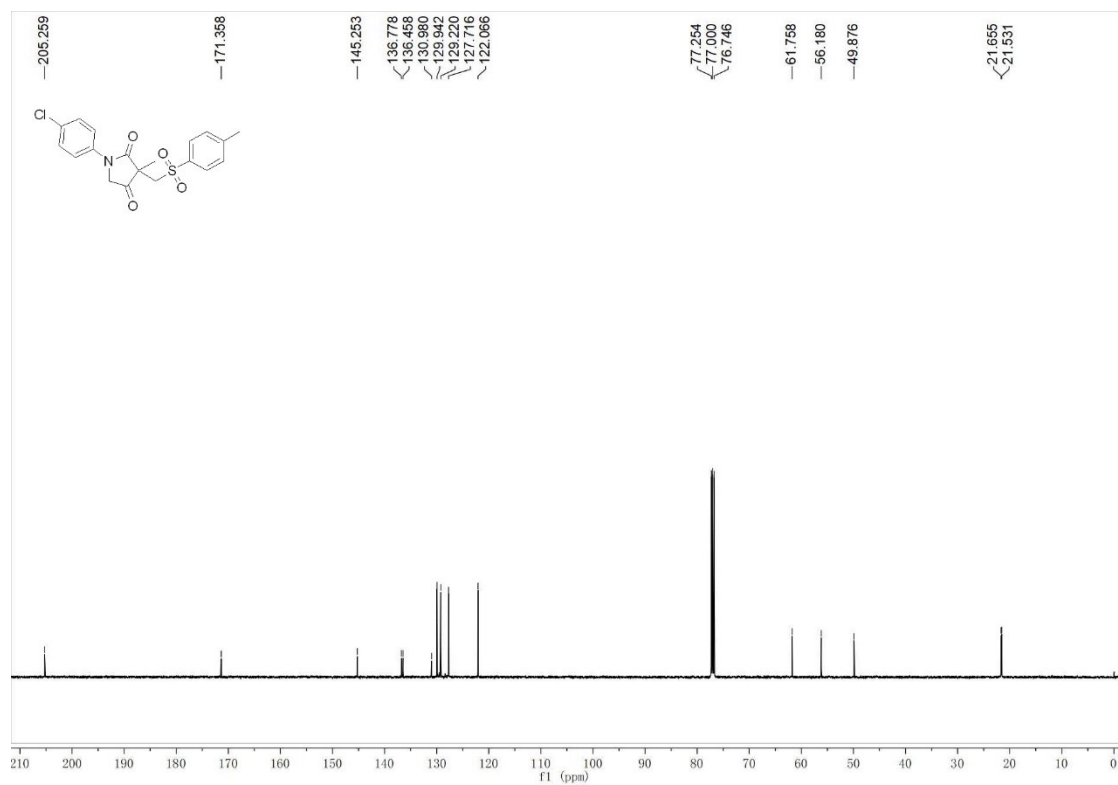

**1-(3,4-Dimethylphenyl)-3-methyl-3-(tosylmethyl)pyrrolidine-2,4-dione (3r)**



### 1-Benzyl-3-methyl-3-(tosylmethyl)pyrrolidine-2,4-dione (3s)

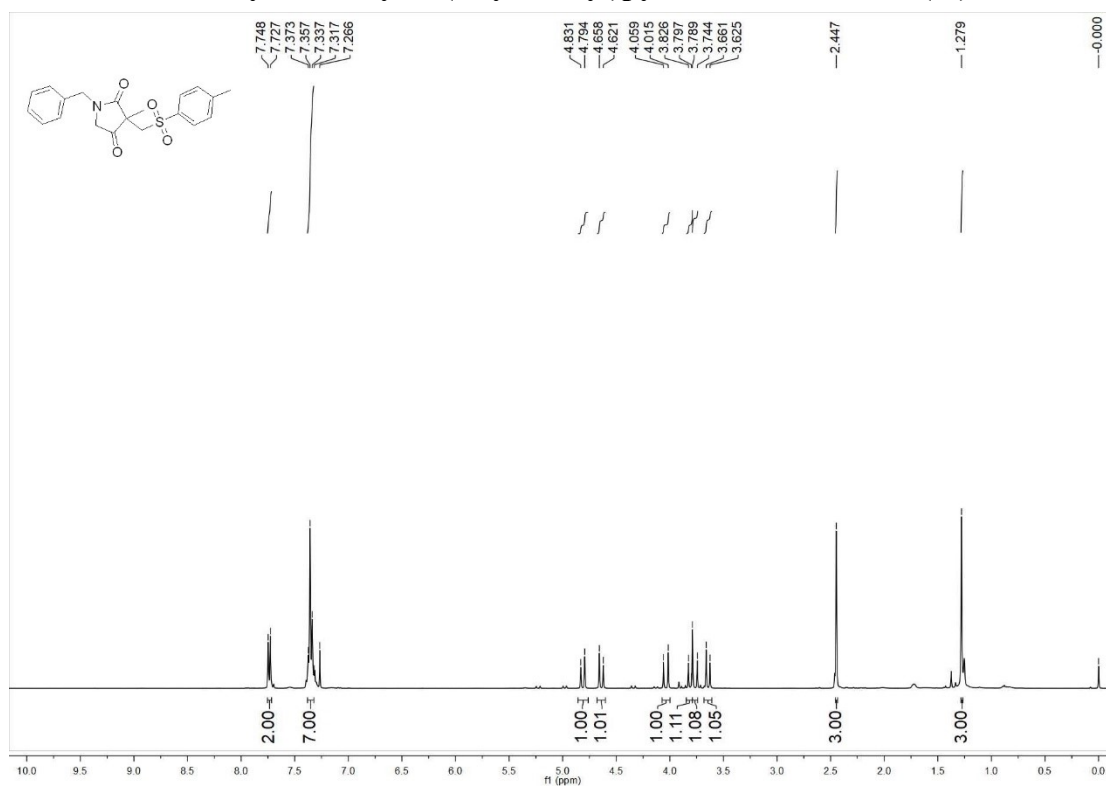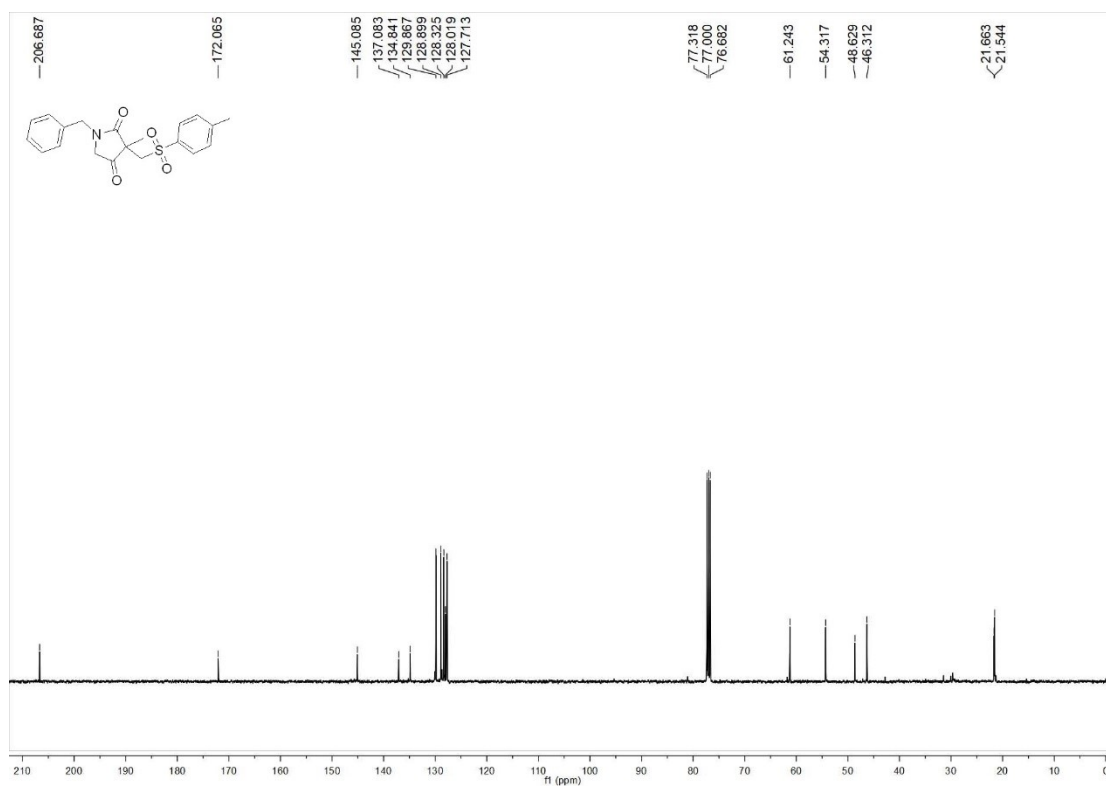



### 3-Methyl-1-(4-methylbenzyl)-3-(tosylmethyl)pyrrolidine-2,4-dione (3t)

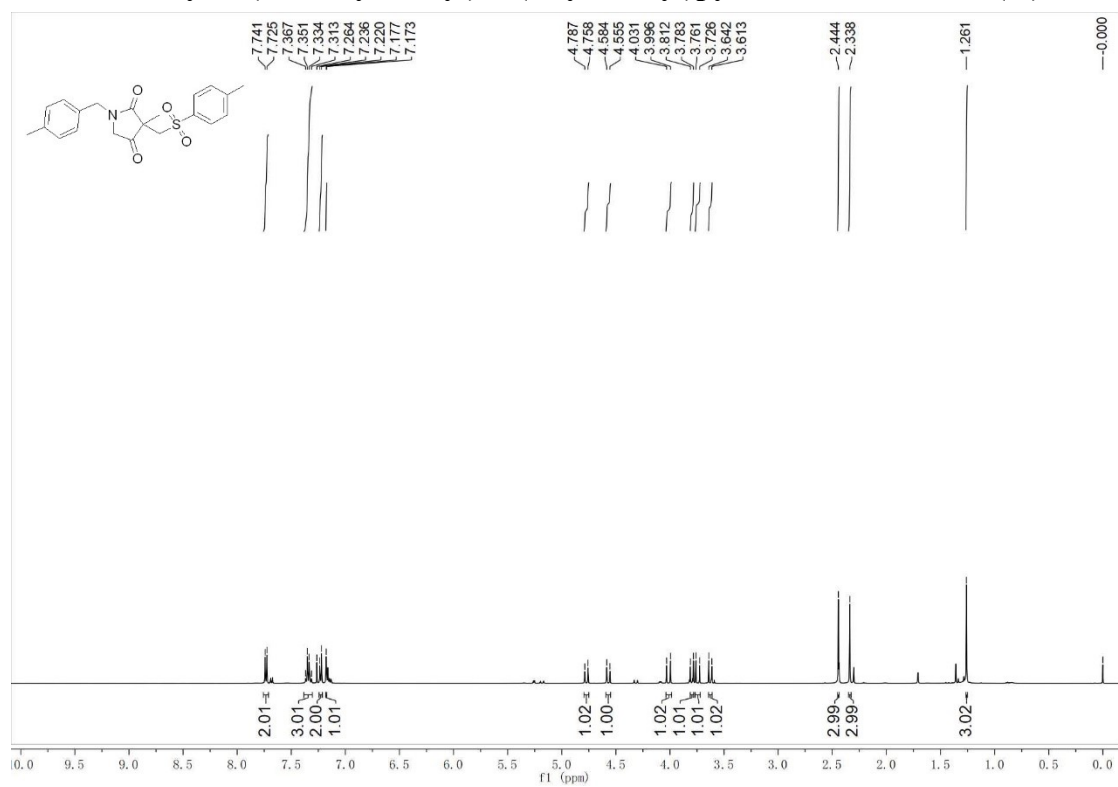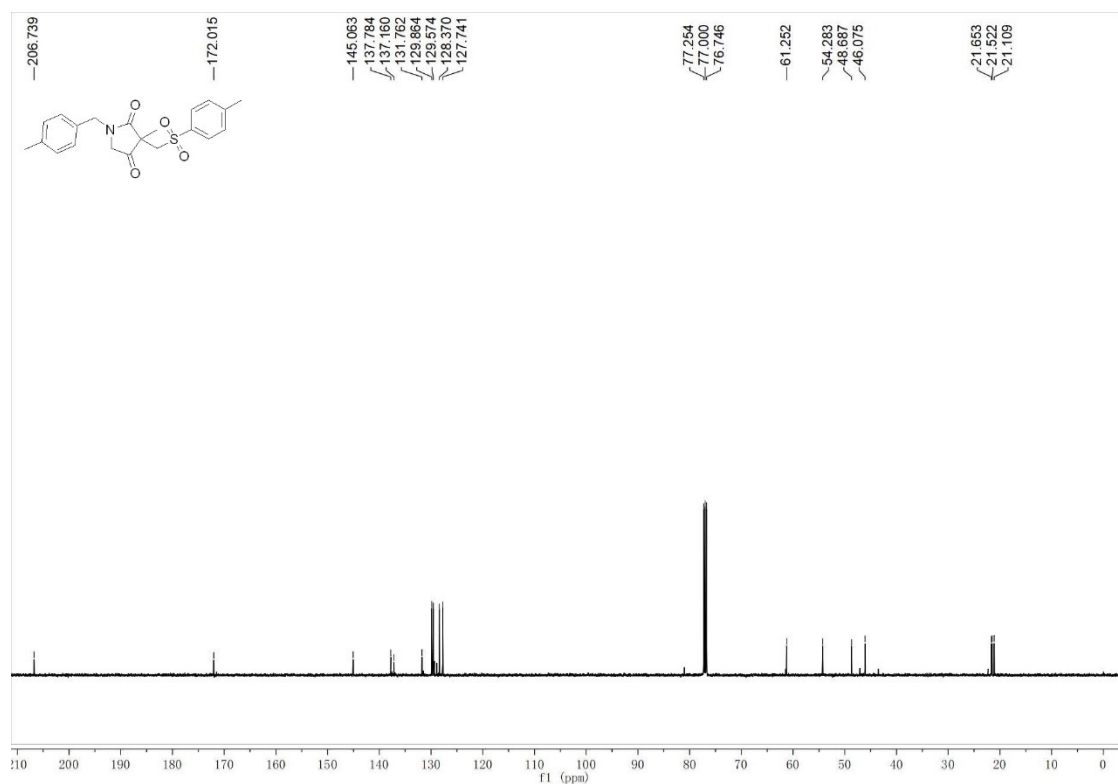

### 1-(4-Methoxybenzyl)-3-methyl-3-(tosylmethyl)pyrrolidine-2,4-dione (3u)

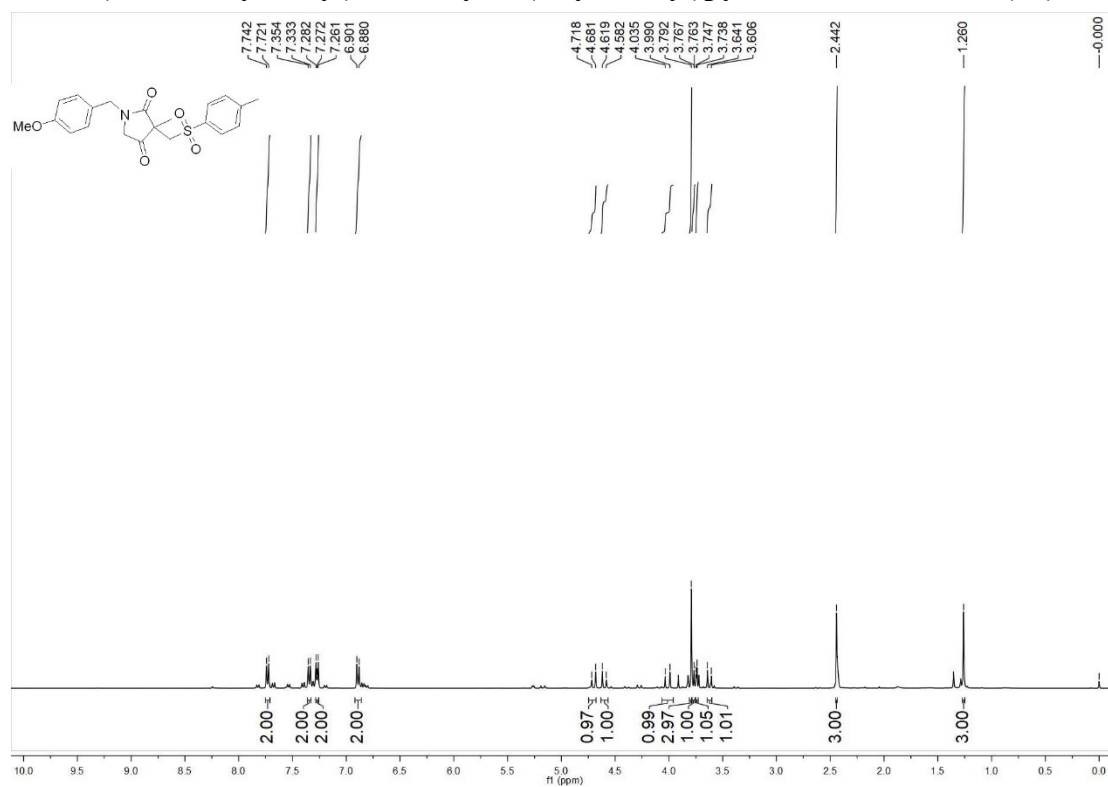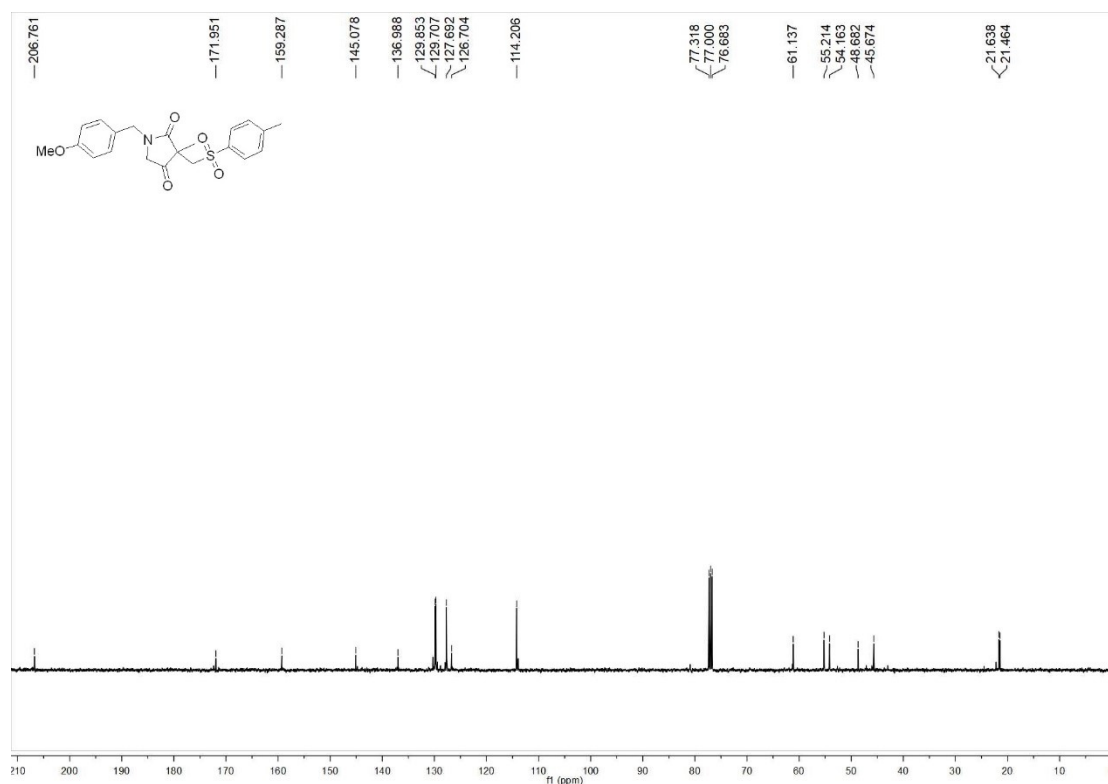

### 1-(4-Bromobenzyl)-3-methyl-3-(tosylmethyl)pyrrolidine-2,4-dione (3v)

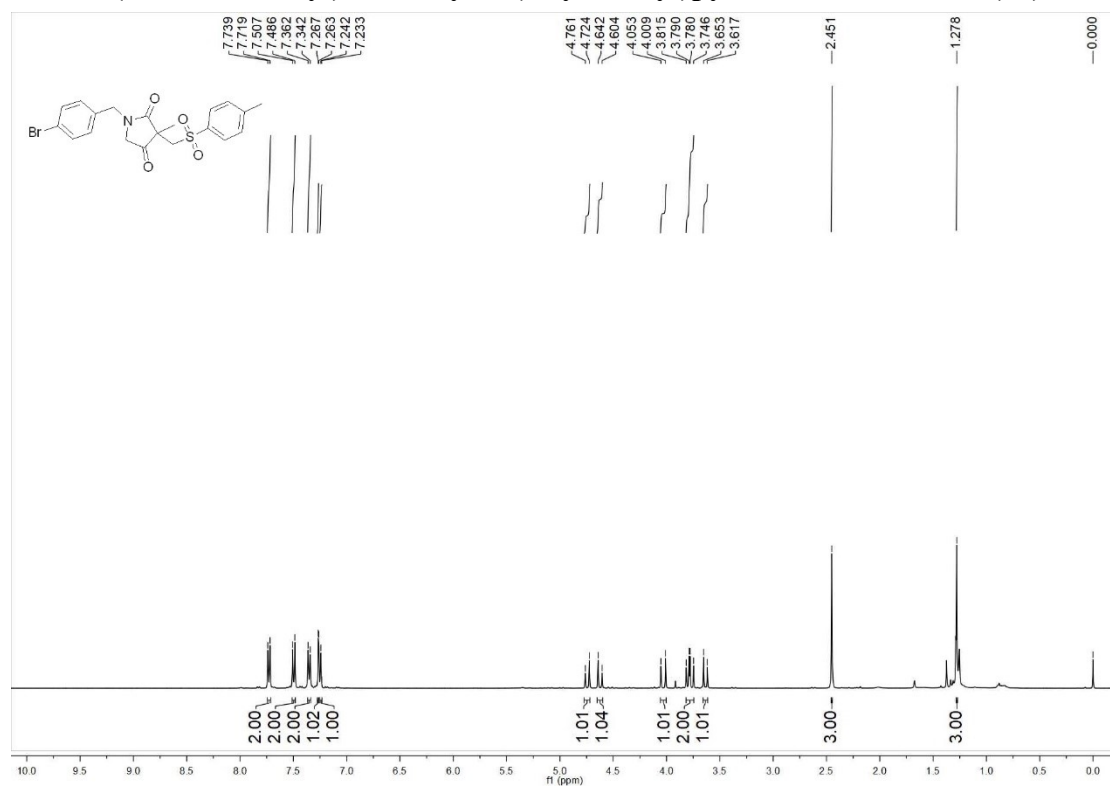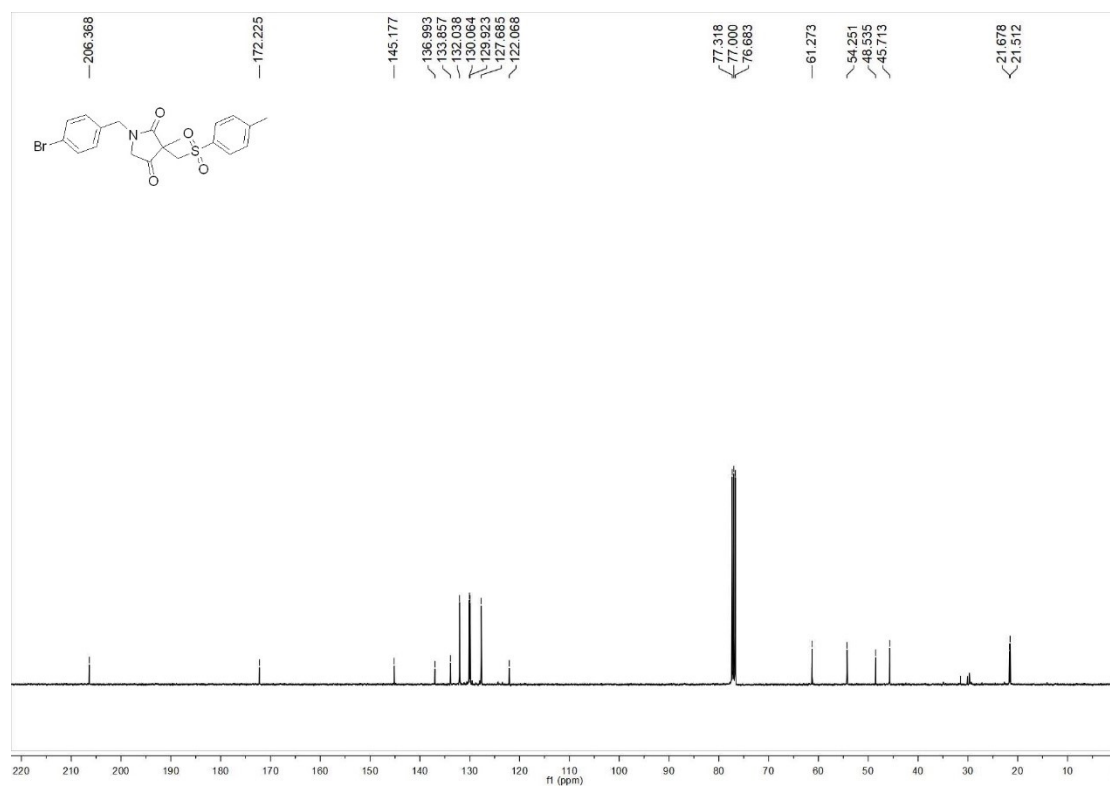

### 3-Methyl-1-phenethyl-3-(tosylmethyl)pyrrolidine-2,4-dione (3w)

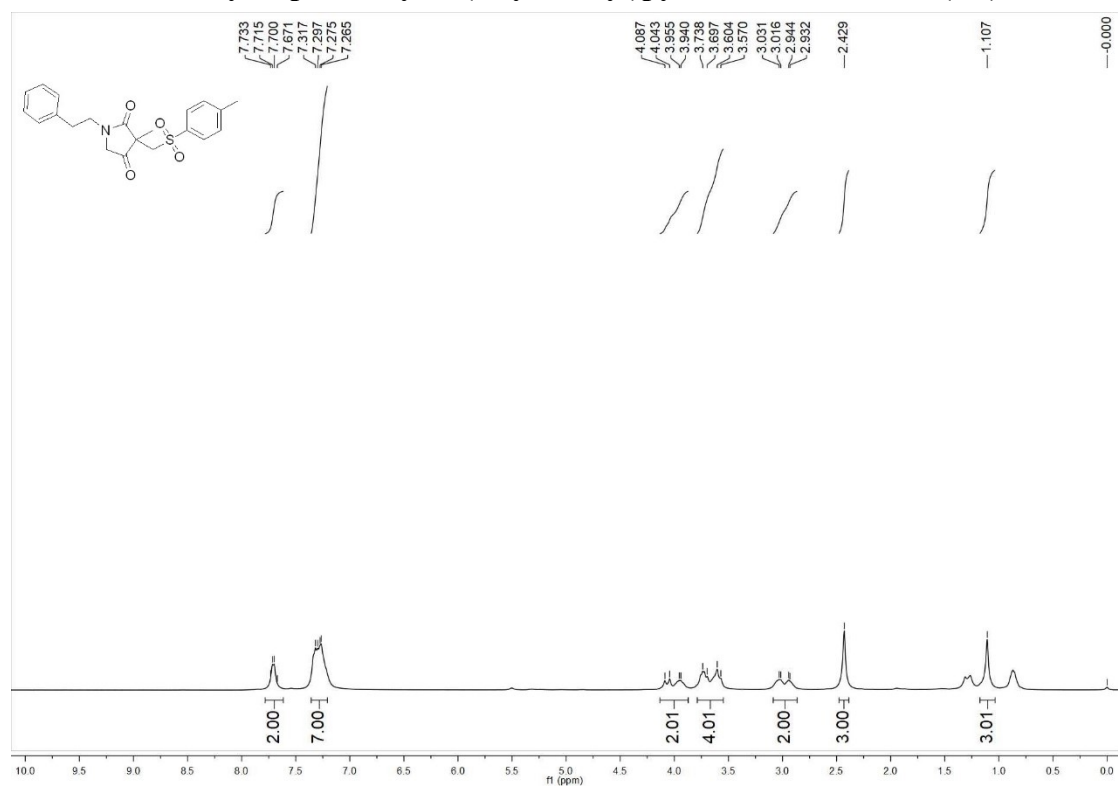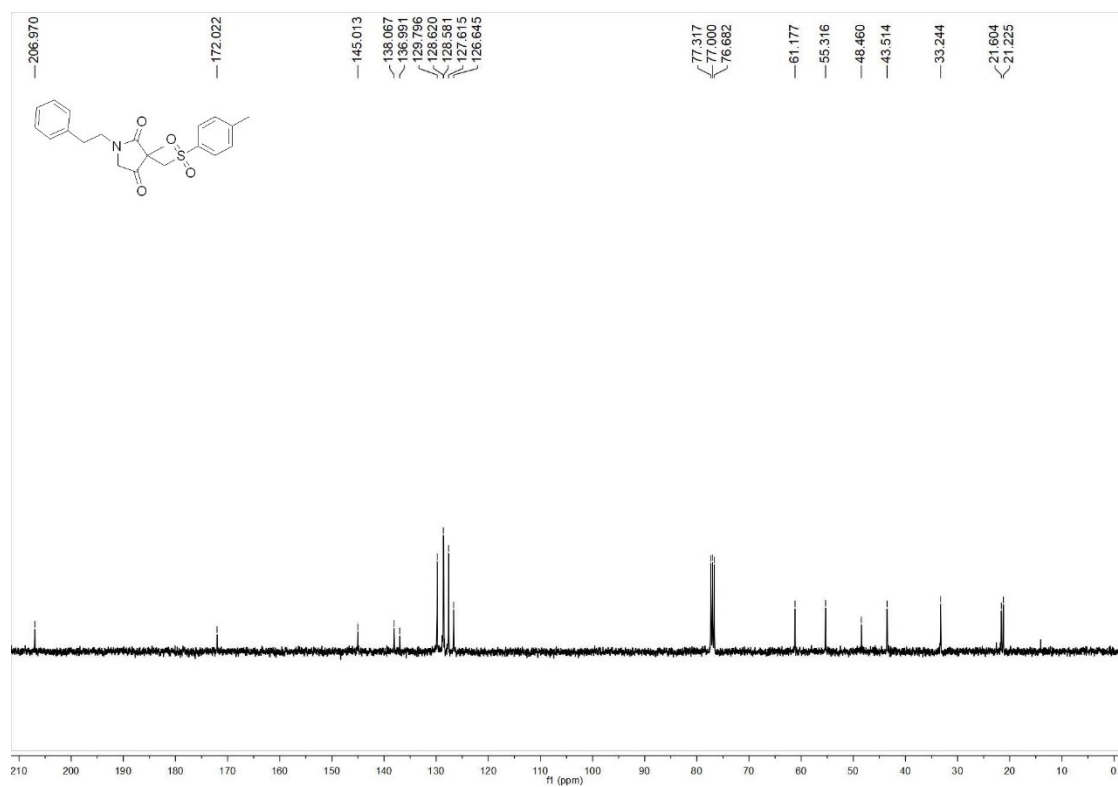

# 1-(3,4-Dimethoxyphenethyl)-3-methyl-3-(tosylmethyl)pyrrolidine-2,4-dione (3x)

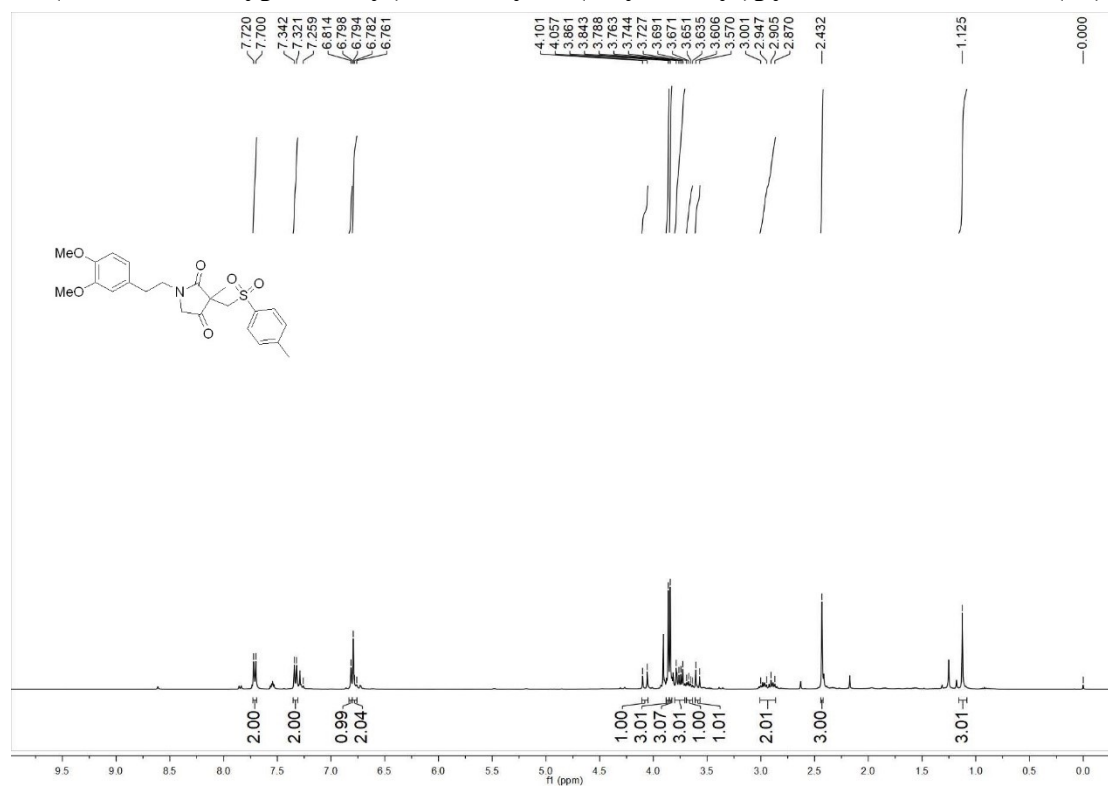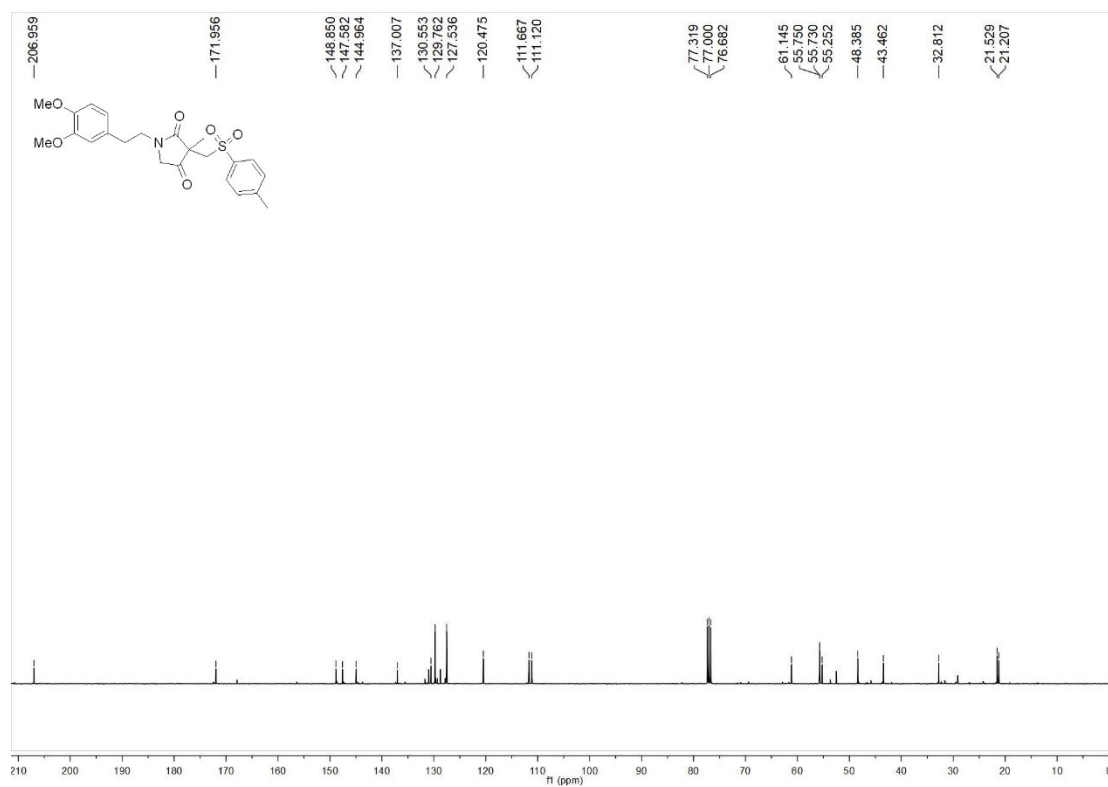

**3-(((3-Chlorophenyl)sulfonyl)methyl)-3-methyl-1-(*p*-tolyl)pyrrolidine-2,4-dione  
(3z)**

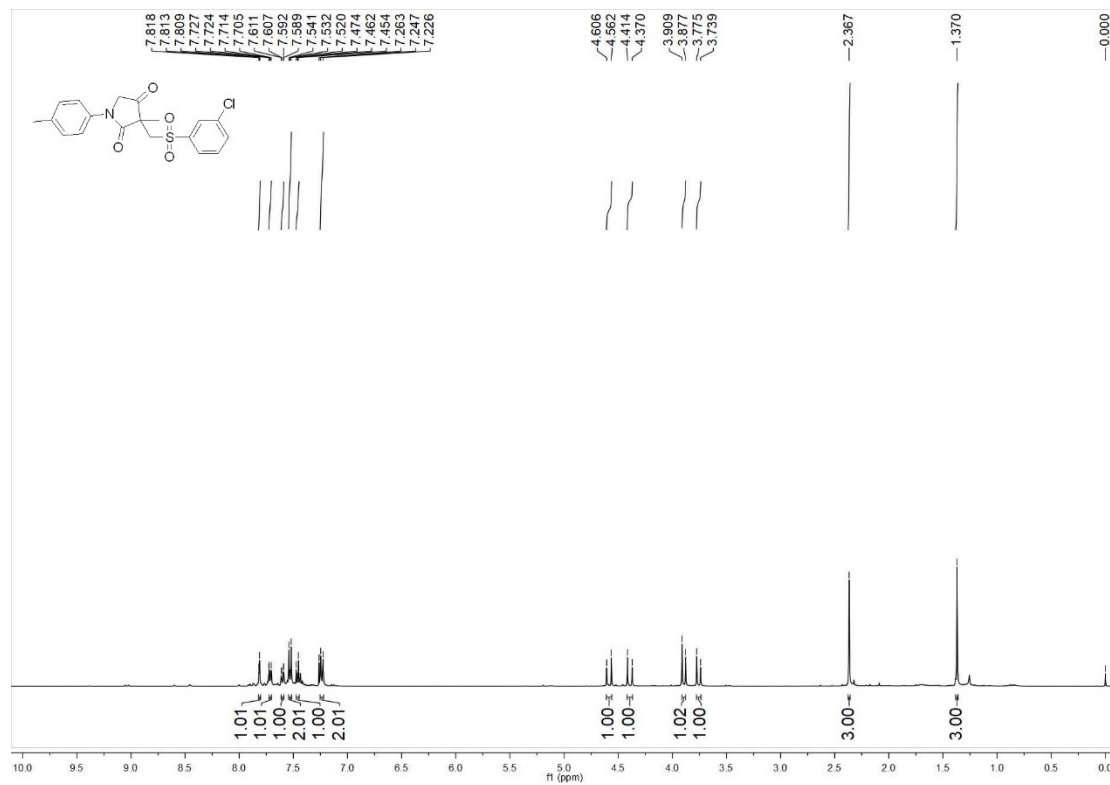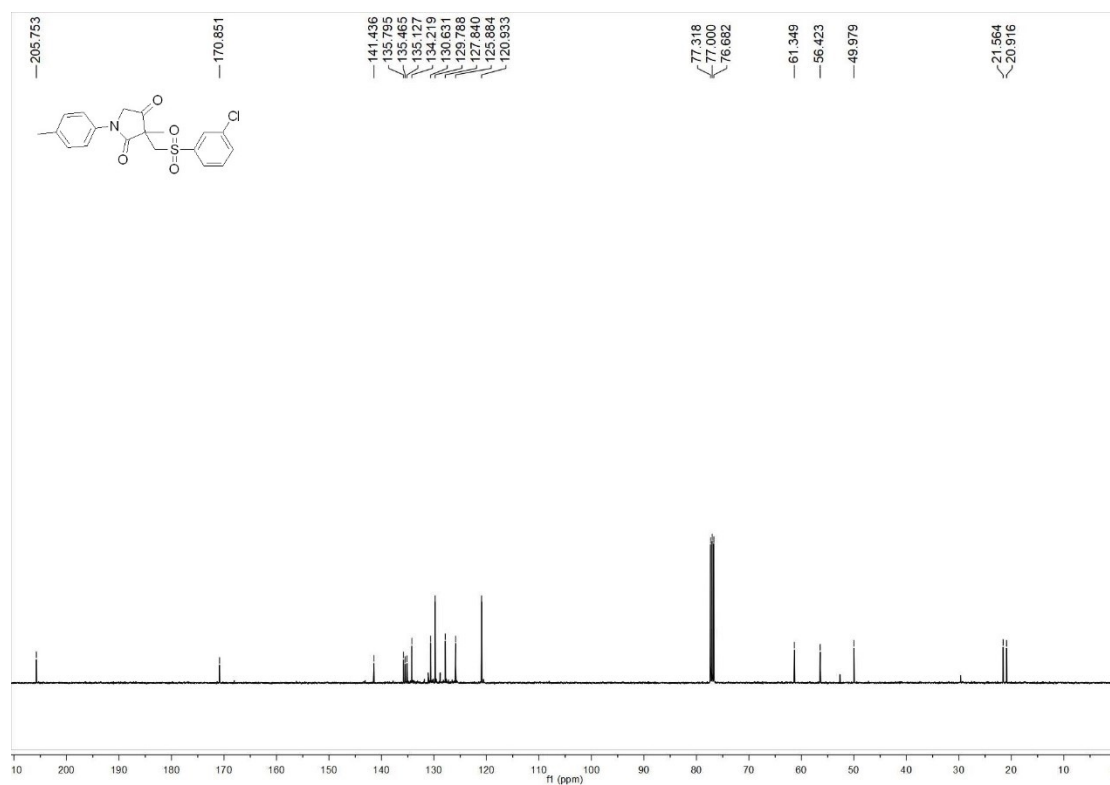

**1-(4-(*tert*-Butyl)phenyl)-3-(((3-chlorophenyl)sulfonyl)methyl)-3-methylpyrrolidine-2,4-dione (3aa)**

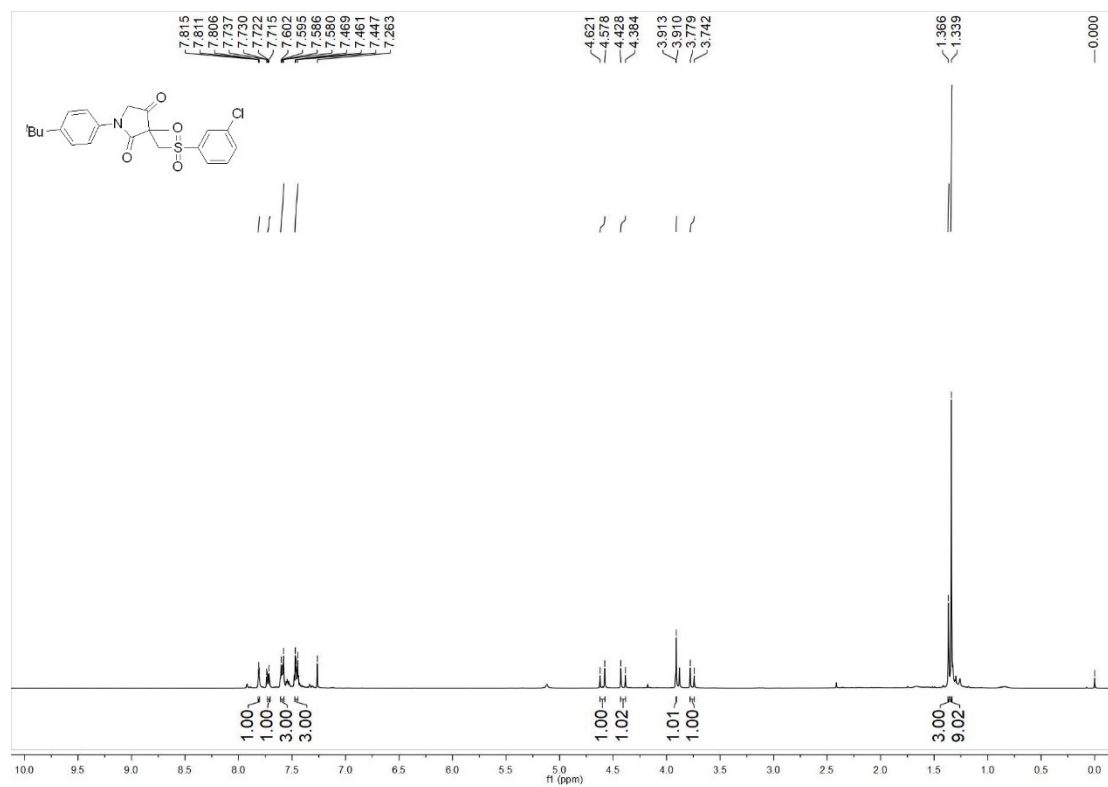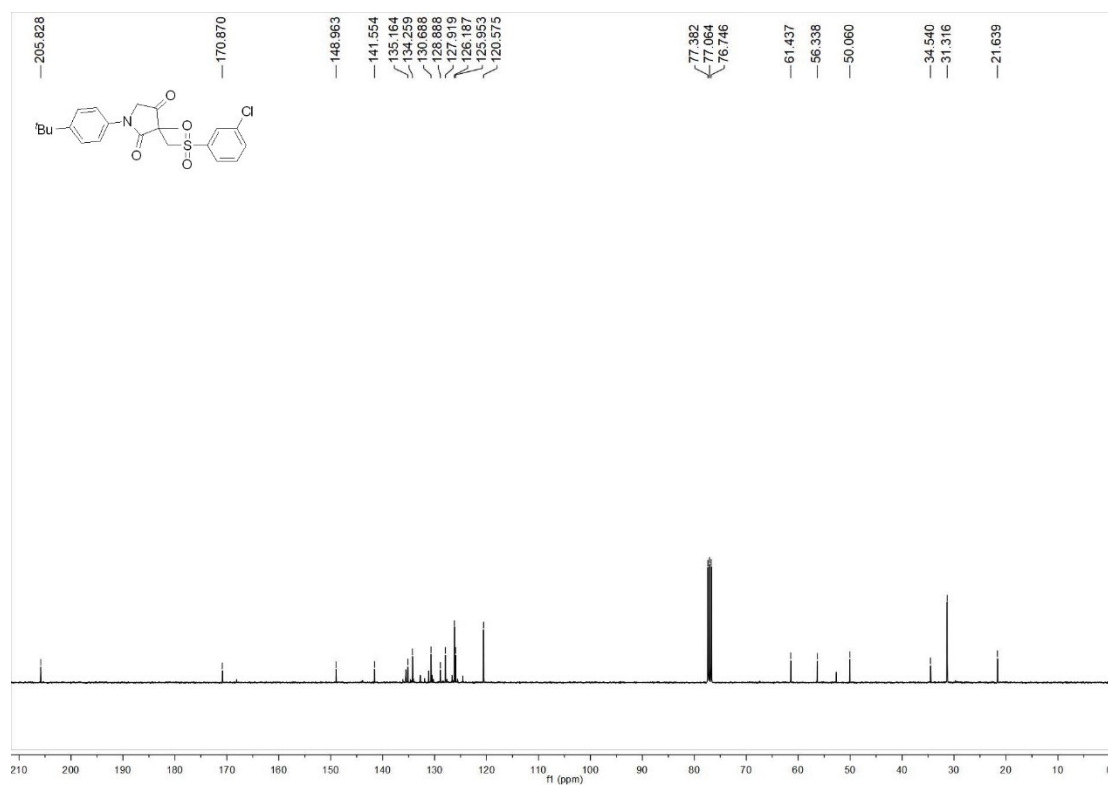

**3-Methyl-3-((naphthalen-1-ylsulfonyl)methyl)-1-(*p*-tolyl)pyrrolidine-2,4-dione  
(3ab)**

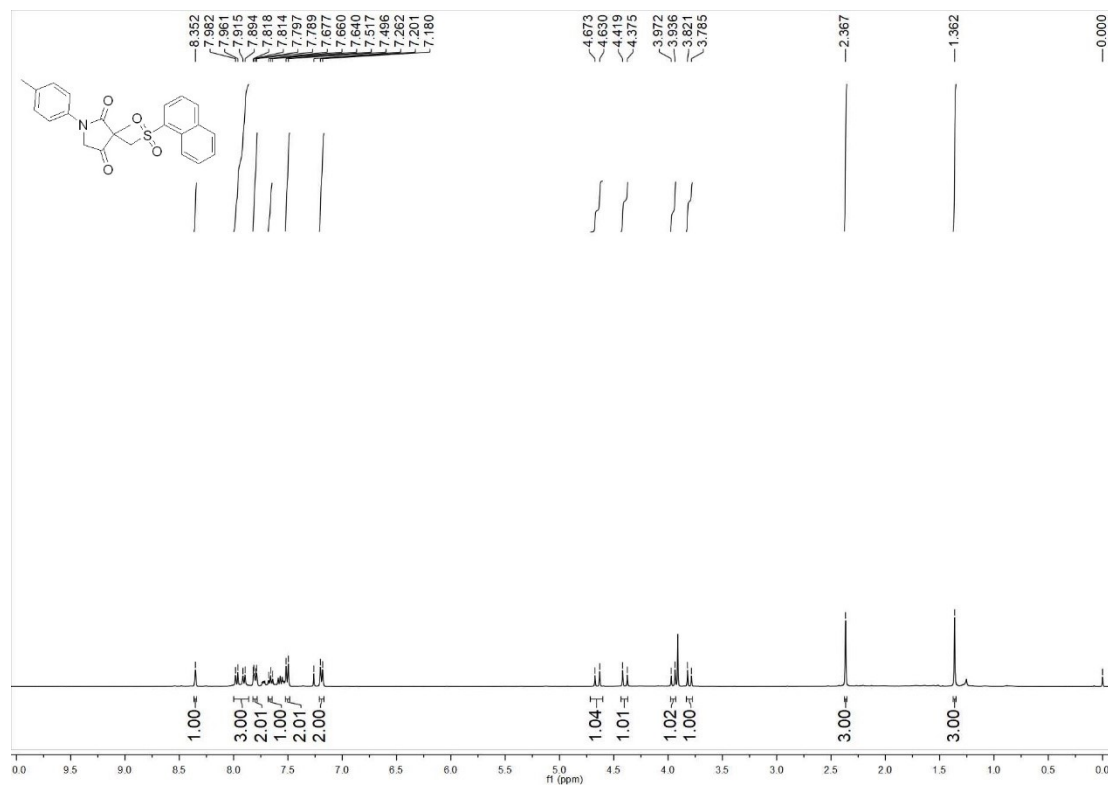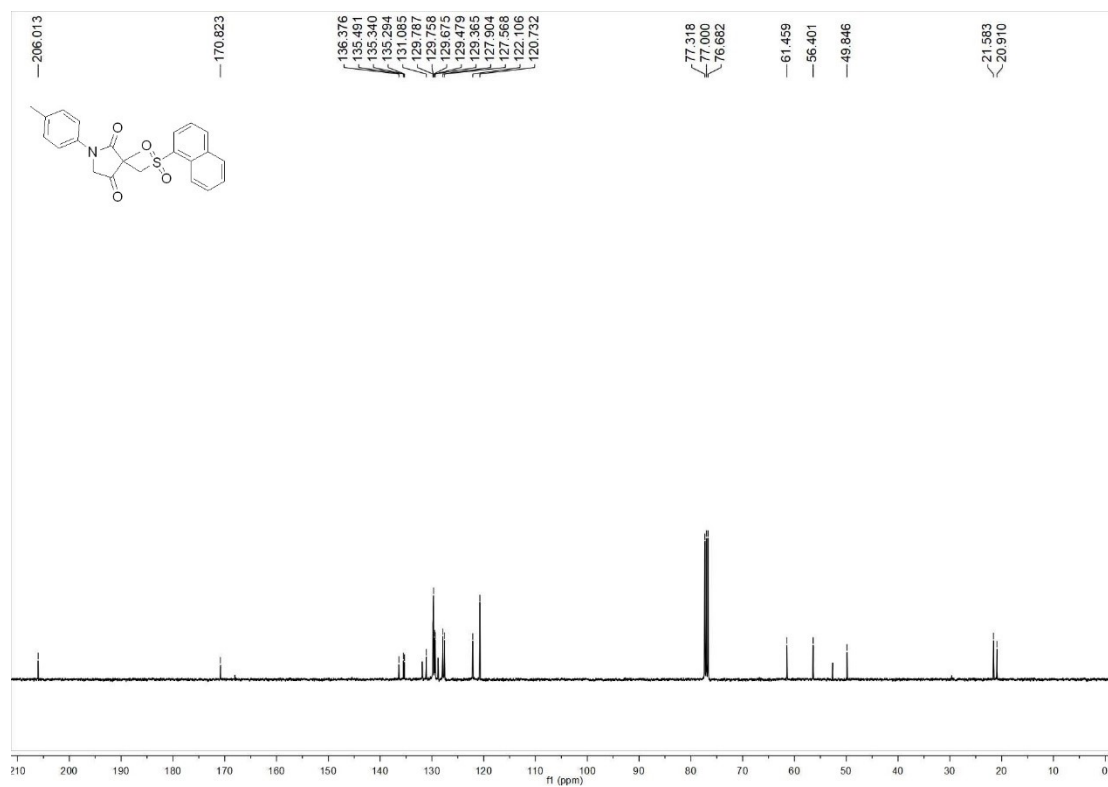



**3-(5-Methoxy-3-methyl-2-oxo-3-(tosylmethyl)indolin-1-yl)propanenitrile (4a)**

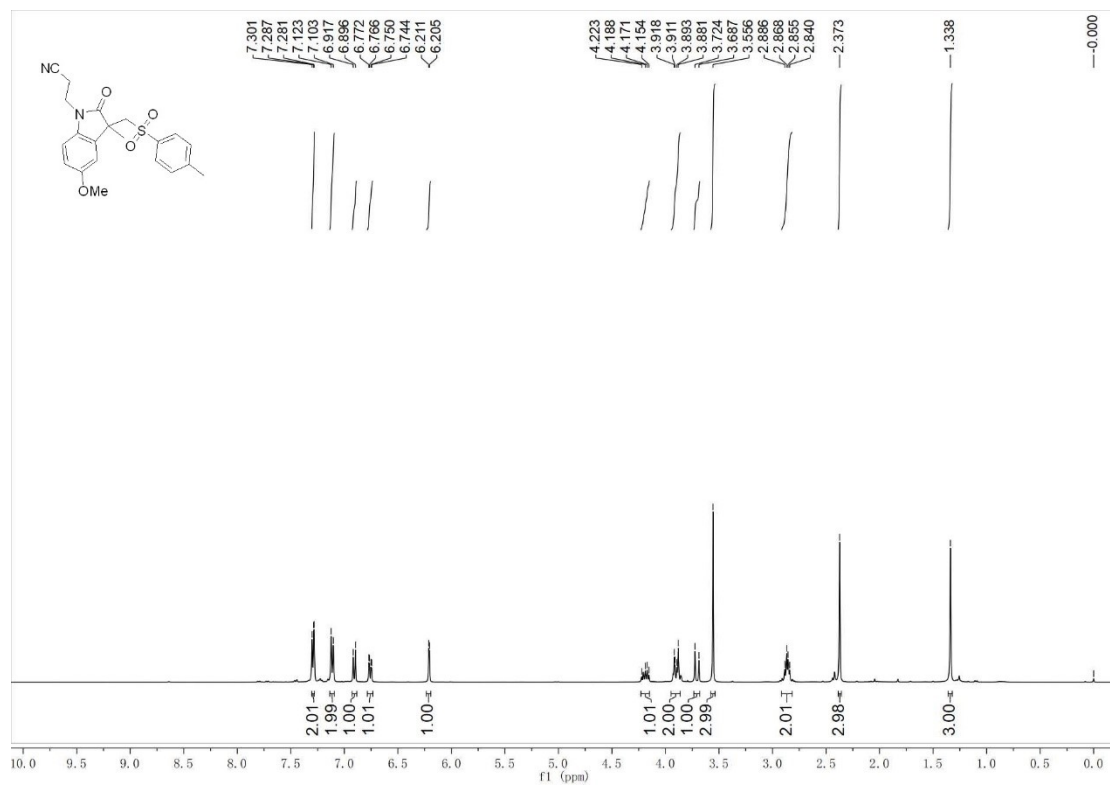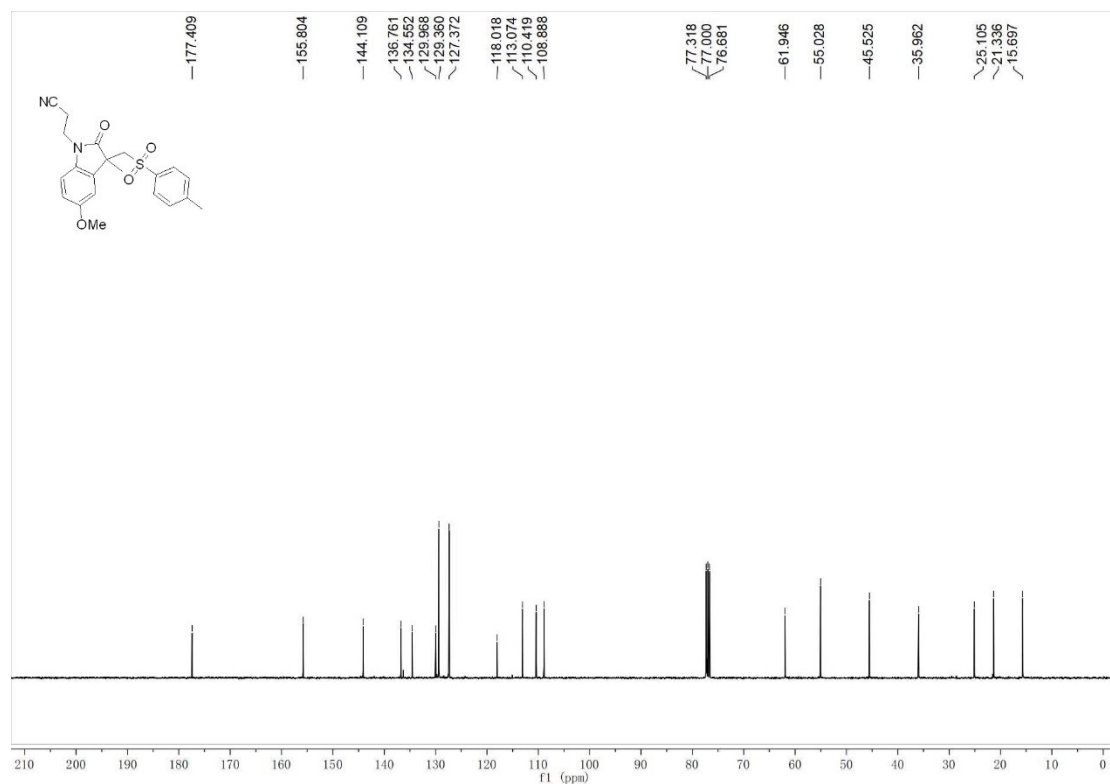

### 4-(Tosylmethyl)-1,2-dihydronaphthalene (5a)

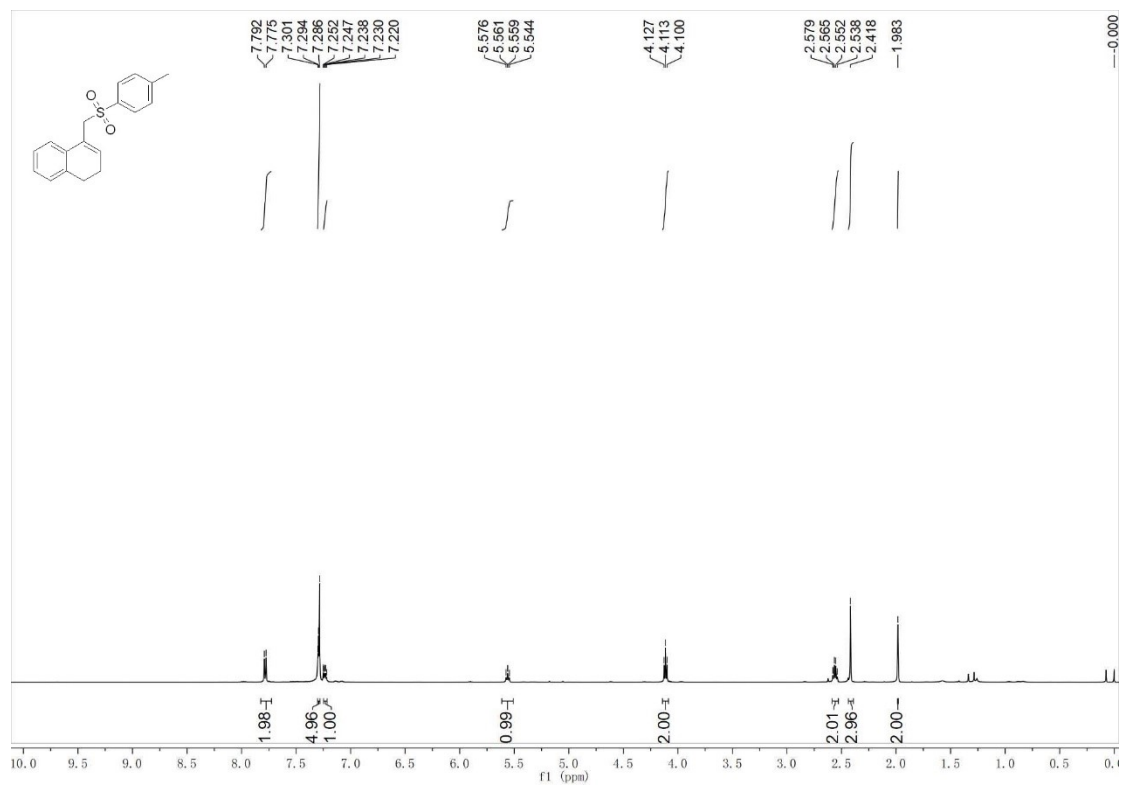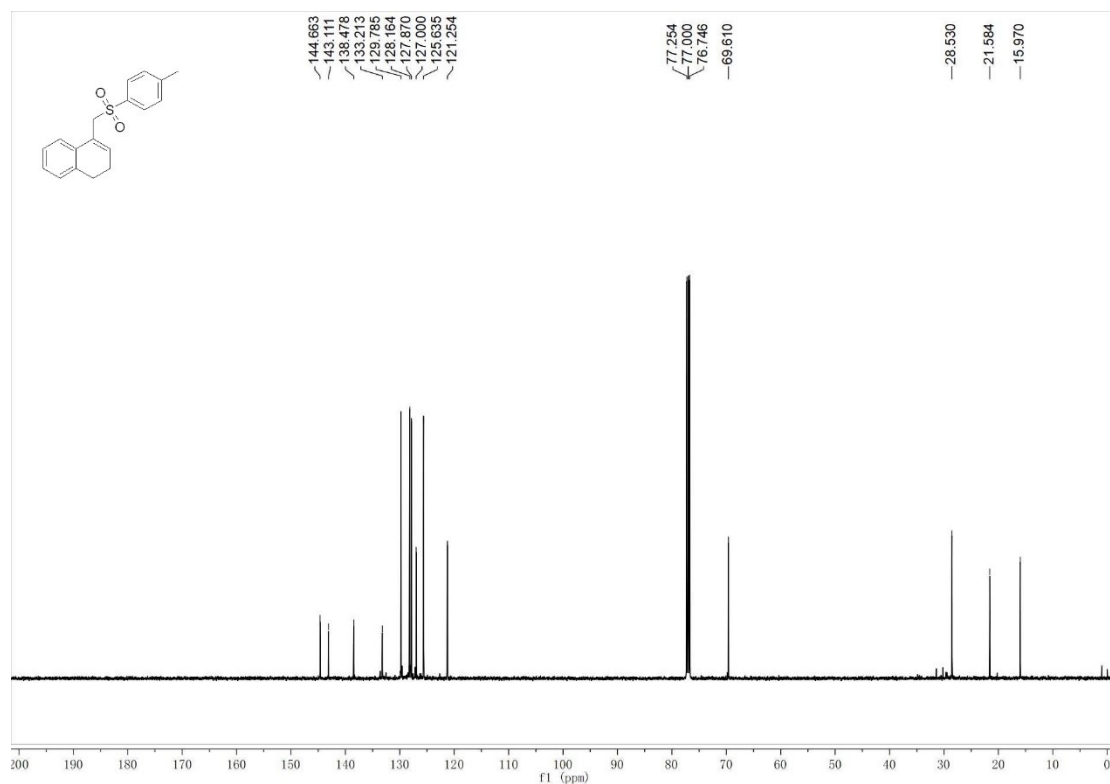

**(E) The X-ray single-crystal diffraction analysis of product 3a**

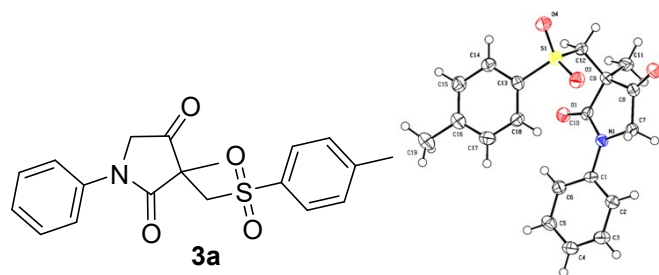

**Table 1 Crystal data and structure refinement for 3a.**

|                                             |                                                               |
|---------------------------------------------|---------------------------------------------------------------|
| Identification code                         | <b>3a</b>                                                     |
| Empirical formula                           | C <sub>19</sub> H <sub>19</sub> NO <sub>4</sub> S             |
| Formula weight                              | 357.41                                                        |
| Temperature/K                               | 150.0                                                         |
| Crystal system                              | monoclinic                                                    |
| Space group                                 | Cc                                                            |
| a/Å                                         | 14.0585(9)                                                    |
| b/Å                                         | 6.5274(3)                                                     |
| c/Å                                         | 19.2202(11)                                                   |
| $\alpha$ /°                                 | 90                                                            |
| $\beta$ /°                                  | 106.051(2)                                                    |
| $\gamma$ /°                                 | 90                                                            |
| Volume/Å <sup>3</sup>                       | 1694.99(17)                                                   |
| Z                                           | 4                                                             |
| $\rho_{\text{calc}}$ /cm <sup>3</sup>       | 1.401                                                         |
| $\mu$ /mm <sup>-1</sup>                     | 0.215                                                         |
| F(000)                                      | 752.0                                                         |
| Crystal size/mm <sup>3</sup>                | 0.15 × 0.08 × 0.05                                            |
| Radiation                                   | MoK $\alpha$ ( $\lambda$ = 0.71073)                           |
| 2 $\theta$ range for data collection/°      | 6.03 to 52.87                                                 |
| Index ranges                                | -17 ≤ h ≤ 16, -8 ≤ k ≤ 7, -24 ≤ l ≤ 24                        |
| Reflections collected                       | 7146                                                          |
| Independent reflections                     | 2980 [R <sub>int</sub> = 0.0399, R <sub>sigma</sub> = 0.0488] |
| Data/restraints/parameters                  | 2980/2/228                                                    |
| Goodness-of-fit on F <sup>2</sup>           | 1.079                                                         |
| Final R indexes [I ≥ 2 $\sigma$ (I)]        | R <sub>1</sub> = 0.0406, wR <sub>2</sub> = 0.0846             |
| Final R indexes [all data]                  | R <sub>1</sub> = 0.0532, wR <sub>2</sub> = 0.0951             |
| Largest diff. peak/hole / e Å <sup>-3</sup> | 0.33/-0.34                                                    |
| Flack parameter                             | 0.05(5)                                                       |

**Table 2 Fractional Atomic Coordinates ( $\times 10^4$ ) and Equivalent Isotropic Displacement Parameters ( $\text{\AA}^2 \times 10^3$ ) for 3a.**

$U_{\text{eq}}$  is defined as 1/3 of of the trace of the orthogonalised  $U_{\text{IJ}}$  tensor.

| Atom | <i>x</i>  | <i>y</i>   | <i>z</i>   | U(eq)    |
|------|-----------|------------|------------|----------|
| S1   | 6532.6(7) | 3984.5(15) | 6186.1(5)  | 26.9(3)  |
| O4   | 7446(2)   | 3220(5)    | 6652.9(15) | 33.5(7)  |
| O1   | 3835(2)   | 2618(4)    | 5336.9(14) | 29.2(7)  |
| O2   | 5198(2)   | 7923(5)    | 6972.9(15) | 39.0(8)  |
| O3   | 6457(3)   | 6138(4)    | 5998.7(15) | 33.6(8)  |
| C1   | 3435(3)   | 6484(6)    | 4489(2)    | 23.2(9)  |
| C10  | 4081(3)   | 4306(6)    | 5587(2)    | 22.6(9)  |
| C13  | 6241(3)   | 2553(6)    | 5376(2)    | 25.7(9)  |
| N1   | 3909(2)   | 6148(5)    | 5240.7(16) | 22.8(8)  |
| C7   | 4254(3)   | 7920(6)    | 5721(2)    | 25.0(9)  |
| C8   | 4775(3)   | 6967(6)    | 6437(2)    | 27.1(9)  |
| C6   | 3249(3)   | 4871(6)    | 3995(2)    | 27.7(10) |
| C12  | 5603(3)   | 3463(6)    | 6638(2)    | 24.9(9)  |
| C18  | 5745(3)   | 3454(7)    | 4723(2)    | 29.7(10) |
| C11  | 3969(3)   | 3979(7)    | 6862(2)    | 32.6(11) |
| C14  | 6517(3)   | 506(6)     | 5412(2)    | 29.0(10) |
| C2   | 3176(3)   | 8459(7)    | 4252(2)    | 28.6(10) |
| C4   | 2561(3)   | 7250(7)    | 3027(2)    | 32.3(11) |
| C9   | 4638(3)   | 4655(6)    | 6391(2)    | 24.2(9)  |
| C17  | 5513(4)   | 2265(7)    | 4100(2)    | 34.3(11) |
| C5   | 2815(3)   | 5275(7)    | 3266(2)    | 32.0(11) |
| C3   | 2747(4)   | 8831(7)    | 3518(2)    | 36.2(11) |
| C15  | 6281(4)   | -643(7)    | 4779(2)    | 32.9(10) |
| C16  | 5765(3)   | 215(7)     | 4122(2)    | 31.0(10) |
| C19  | 5465(4)   | -1116(8)   | 3450(2)    | 40.3(12) |

**Table 3 Anisotropic Displacement Parameters ( $\text{\AA}^2 \times 10^3$ ) for 3a.**

The Anisotropic displacement factor exponent takes the form: -

$$2\pi^2[h^2a^2U_{11}+2hka*b*U_{12}+...].$$

| Atom | U <sub>11</sub> | U <sub>22</sub> | U <sub>33</sub> | U <sub>23</sub> | U <sub>13</sub> | U <sub>12</sub> |
|------|-----------------|-----------------|-----------------|-----------------|-----------------|-----------------|
| S1   | 26.0(6)         | 26.5(5)         | 27.2(5)         | -1.0(4)         | 5.8(4)          | 1.0(5)          |
| O4   | 22.8(16)        | 40.2(18)        | 33.7(16)        | -0.7(13)        | 1.6(13)         | 3.8(14)         |
| O1   | 37.5(19)        | 18.2(14)        | 30.2(14)        | -1.4(12)        | 6.8(14)         | -3.0(13)        |
| O2   | 44(2)           | 35.3(18)        | 29.8(15)        | -11.2(14)       | -2.6(15)        | 4.4(16)         |
| O3   | 38.9(19)        | 22.9(15)        | 39.6(18)        | 0.8(13)         | 11.6(16)        | -2.6(15)        |
| C1   | 20(2)           | 26(2)           | 20.6(19)        | 3.7(15)         | 1.8(17)         | 1.2(17)         |
| C10  | 24(2)           | 19(2)           | 27(2)           | 3.9(16)         | 12.2(18)        | 2.4(17)         |
| C13  | 27(2)           | 27(2)           | 25.0(19)        | -2.2(16)        | 10.3(18)        | -2.4(18)        |
| N1   | 26(2)           | 21.0(17)        | 20.2(15)        | -0.8(13)        | 4.8(14)         | -0.7(15)        |
| C7   | 26(2)           | 21(2)           | 25.2(19)        | -3.7(16)        | 3.1(17)         | -0.4(18)        |
| C8   | 27(2)           | 32(2)           | 22.2(19)        | -2.8(18)        | 6.2(17)         | 5(2)            |
| C6   | 30(3)           | 25(2)           | 28(2)           | 1.5(17)         | 8.6(18)         | 0.0(19)         |
| C12  | 28(2)           | 23(2)           | 24.0(19)        | 3.8(15)         | 7.1(18)         | 4.0(17)         |
| C18  | 32(3)           | 29(2)           | 30(2)           | 4.3(18)         | 10.3(19)        | 6(2)            |
| C11  | 33(3)           | 41(3)           | 25(2)           | 6.0(18)         | 10.4(19)        | 8(2)            |
| C14  | 26(2)           | 30(2)           | 30(2)           | 1.9(17)         | 6.3(19)         | 2(2)            |
| C2   | 30(3)           | 29(2)           | 26(2)           | -0.7(17)        | 5.8(19)         | 0.7(19)         |
| C4   | 28(3)           | 43(3)           | 25(2)           | 5.1(19)         | 5.1(19)         | 2(2)            |
| C9   | 27(2)           | 25.1(19)        | 20.1(18)        | -1.7(16)        | 5.6(18)         | 1.0(18)         |
| C17  | 32(3)           | 42(3)           | 27(2)           | 5.5(19)         | 6(2)            | 2(2)            |
| C5   | 29(3)           | 39(3)           | 26(2)           | -5.5(18)        | 5(2)            | -5(2)           |
| C3   | 35(3)           | 42(3)           | 28(2)           | 5(2)            | 3(2)            | 6(2)            |
| C15  | 41(3)           | 23(2)           | 36(2)           | -0.9(19)        | 12(2)           | -2(2)           |
| C16  | 27(3)           | 37(3)           | 31(2)           | -4.3(19)        | 12(2)           | -8(2)           |
| C19  | 43(3)           | 47(3)           | 31(2)           | -9(2)           | 11(2)           | -9(2)           |

**Table 4 Bond Lengths for 3a.**

| Atom | Atom | Length/Å | Atom | Atom | Length/Å |
|------|------|----------|------|------|----------|
| S1   | O4   | 1.438(3) | C7   | C8   | 1.503(5) |
| S1   | O3   | 1.448(3) | C8   | C9   | 1.521(6) |
| S1   | C13  | 1.764(4) | C6   | C5   | 1.390(6) |
| S1   | C12  | 1.790(4) | C12  | C9   | 1.521(6) |
| O1   | C10  | 1.213(5) | C18  | C17  | 1.389(6) |
| O2   | C8   | 1.210(5) | C11  | C9   | 1.538(6) |
| C1   | N1   | 1.430(5) | C14  | C15  | 1.389(6) |
| C1   | C6   | 1.394(6) | C2   | C3   | 1.394(6) |
| C1   | C2   | 1.382(6) | C4   | C5   | 1.381(6) |
| C10  | N1   | 1.363(5) | C4   | C3   | 1.373(6) |
| C10  | C9   | 1.545(5) | C17  | C16  | 1.382(7) |
| C13  | C18  | 1.387(6) | C15  | C16  | 1.389(6) |
| C13  | C14  | 1.388(6) | C16  | C19  | 1.516(6) |
| N1   | C7   | 1.476(5) |      |      |          |

**Table 5 Bond Angles for 3a.**

| Atom | Atom | Atom | Angle/°    | Atom | Atom | Atom | Angle/°  |
|------|------|------|------------|------|------|------|----------|
| O4   | S1   | O3   | 118.93(19) | C7   | C8   | C9   | 109.6(3) |
| O4   | S1   | C13  | 108.43(19) | C5   | C6   | C1   | 119.4(4) |
| O4   | S1   | C12  | 106.12(18) | C9   | C12  | S1   | 117.4(3) |
| O3   | S1   | C13  | 108.16(18) | C13  | C18  | C17  | 118.9(4) |
| O3   | S1   | C12  | 106.98(19) | C13  | C14  | C15  | 118.8(4) |
| C13  | S1   | C12  | 107.74(19) | C1   | C2   | C3   | 119.9(4) |
| C6   | C1   | N1   | 121.3(3)   | C3   | C4   | C5   | 119.4(4) |
| C2   | C1   | N1   | 118.9(3)   | C8   | C9   | C10  | 103.0(3) |
| C2   | C1   | C6   | 119.8(3)   | C8   | C9   | C12  | 113.6(4) |
| O1   | C10  | N1   | 128.0(4)   | C8   | C9   | C11  | 109.8(3) |
| O1   | C10  | C9   | 122.7(3)   | C12  | C9   | C10  | 113.4(3) |
| N1   | C10  | C9   | 109.3(3)   | C12  | C9   | C11  | 107.9(3) |
| C18  | C13  | S1   | 120.7(3)   | C11  | C9   | C10  | 108.9(3) |
| C18  | C13  | C14  | 121.1(4)   | C16  | C17  | C18  | 121.2(4) |
| C14  | C13  | S1   | 118.3(3)   | C4   | C5   | C6   | 120.8(4) |
| C1   | N1   | C7   | 119.5(3)   | C4   | C3   | C2   | 120.7(4) |
| C10  | N1   | C1   | 126.8(3)   | C16  | C15  | C14  | 121.1(4) |
| C10  | N1   | C7   | 113.7(3)   | C17  | C16  | C15  | 118.9(4) |
| N1   | C7   | C8   | 104.0(3)   | C17  | C16  | C19  | 121.4(4) |
| O2   | C8   | C7   | 124.5(4)   | C15  | C16  | C19  | 119.7(4) |
| O2   | C8   | C9   | 125.9(4)   |      |      |      |          |

**Table 6 Hydrogen Atom Coordinates ( $\text{\AA}\times 10^4$ ) and Isotropic Displacement Parameters ( $\text{\AA}^2\times 10^3$ ) for 3a.**

| <b>Atom</b> | <b>x</b> | <b>y</b> | <b>z</b> | <b>U(eq)</b> |
|-------------|----------|----------|----------|--------------|
| H7A         | 3689.64  | 8771.62  | 5762.28  | 30           |
| H7B         | 4713.65  | 8780.62  | 5539.27  | 30           |
| H6          | 3416.7   | 3507.31  | 4154.6   | 33           |
| H12A        | 5443.13  | 1984.89  | 6582.58  | 30           |
| H12B        | 5893.21  | 3727.96  | 7160.64  | 30           |
| H18         | 5567.88  | 4861.36  | 4702.81  | 36           |
| H11A        | 3364.55  | 4807.87  | 6741.03  | 49           |
| H11B        | 4321.74  | 4167.67  | 7374.26  | 49           |
| H11C        | 3795.71  | 2530.69  | 6770.4   | 49           |
| H14         | 6860.99  | -98.4    | 5860.41  | 35           |
| H2          | 3291.43  | 9560.42  | 4587.78  | 34           |
| H4          | 2260.39  | 7511.71  | 2528.64  | 39           |
| H17         | 5174.16  | 2871.38  | 3650.29  | 41           |
| H5          | 2691.98  | 4179.64  | 2927.05  | 38           |
| H3          | 2580.28  | 10193.04 | 3355.15  | 43           |
| H15         | 6476.41  | -2039.5  | 4795.44  | 39           |
| H19A        | 4792.92  | -1636.54 | 3388.79  | 60           |
| H19B        | 5925.41  | -2270.15 | 3502.71  | 60           |
| H19C        | 5483.19  | -302.6   | 3025.78  | 60           |
